# Supplementary material
Source: PubMed Central journal article supplement (PMC8762568)
Supplement: EMBJ-41-e108591-s002.pdf [file EMBJ-41-e108591-s002.pdf]

## Expanded View Figures

**Figure EV1. Over-representation of A $\beta$  APRs in tau tangles and amyloid plaques.**

- A Subcellular localization of proteins found in amyloid plaques (Xiong *et al*, 2019a, b).
- B No over-representation was observed of any A $\beta$  regions in Tau tangles isolated from human AD brains (Drummond *et al*, 2020a, b). Hippocampal formation data set from Human Protein Atlas was used as background. Statistics: Hypergeometric test with Bonferroni correction. \* $P \leq 0.05$ .
- C Over-representation of C-terminal APR in A $\beta$  amyloid plaques isolated from human AD brains. (Drummond *et al*, 2017a, b). Hippocampal formation data set from Human Protein Atlas was used as background. Statistics: Hypergeometric test with Bonferroni correction. \* $P \leq 0.05$ , \*\* $P \leq 0.01$ , \*\*\*\* $P \leq 0.0001$ .

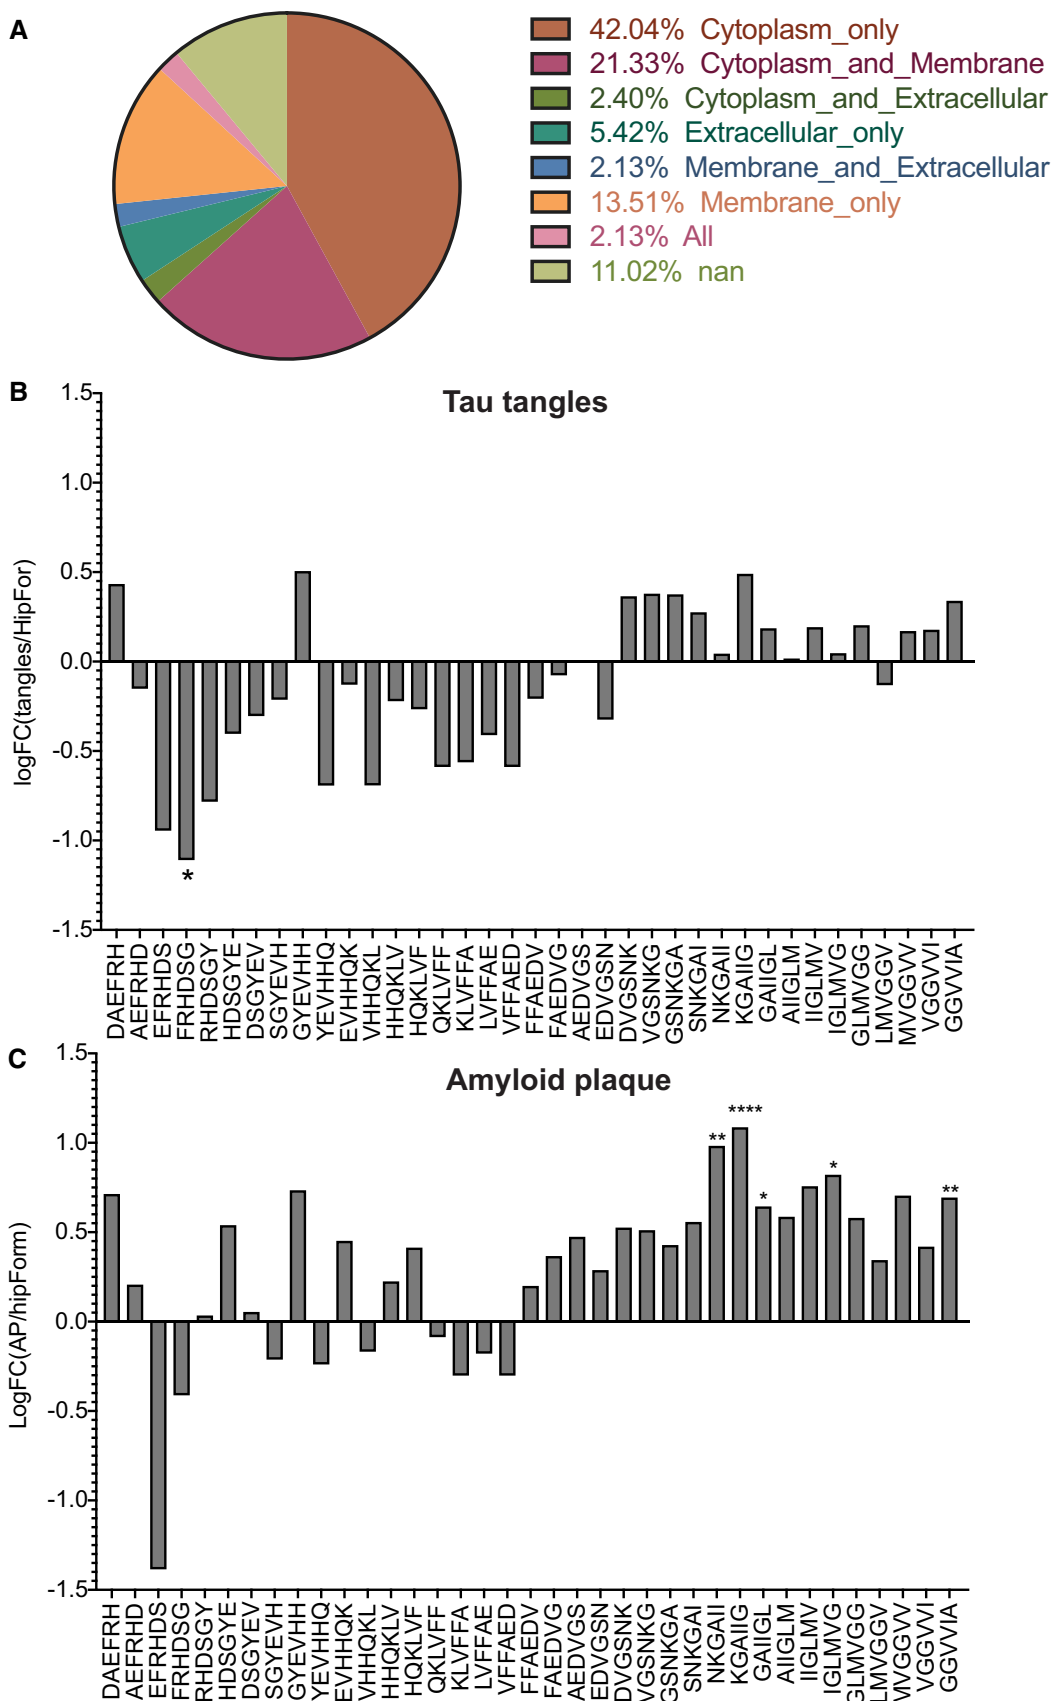

Figure EV1.

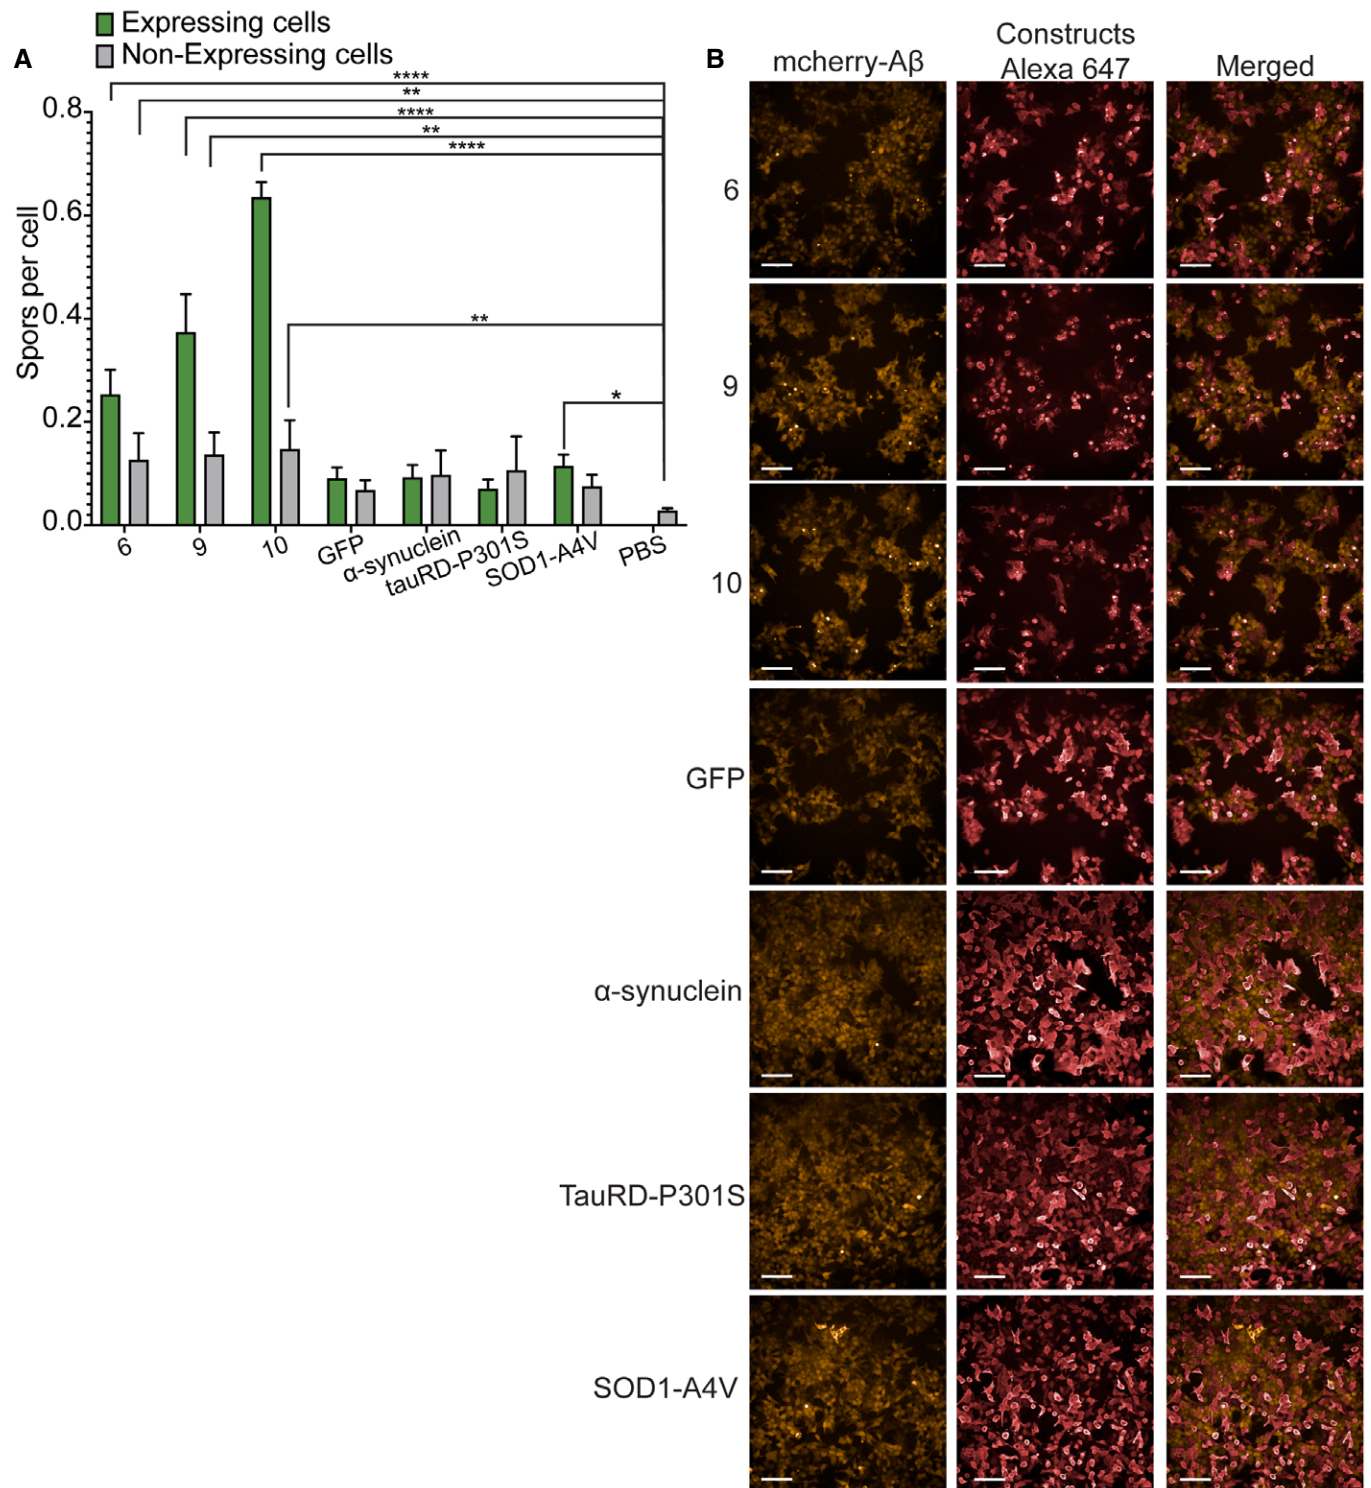

**Figure EV2. Effect of expression of amyloidogenic proteins in aggregation of Aβ.**

A Quantification of spots per cell for aggregation inducer constructs (6, 9, 10) and known amyloidogenic proteins (α-synuclein, tauRD-P301S, SOD1-A4V). Graph: mean with 95% CI. (*n* = 4 independent experiments, statistics: ordinary one-way ANOVA). \**P* ≤ 0.05, \*\**P* ≤ 0.01, \*\*\*\**P* ≤ 0.0001.

B Representative images of cells expressing the different constructs. mCherry indicates Aβ, Alexa647 the constructs. Scale bars: 100 μm.
