# Supplementary material
Source: PubMed Central journal article supplement (PMC8762568)
Supplement: EMBJ-41-e108591-s005.pdf [file EMBJ-41-e108591-s005.pdf]

## Table of Contents

|                                                                                                                                                                    |    |
|--------------------------------------------------------------------------------------------------------------------------------------------------------------------|----|
| <i>Appendix Material and Methods</i> .....                                                                                                                         | 2  |
| <i>Appendix Table S1: Sequences printed in A<math>\beta</math> sliding window membranes</i> .....                                                                  | 6  |
| <i>Appendix Table S2: Sequences printed in PLAK/AD membranes</i> .....                                                                                             | 7  |
| <i>Appendix Figure S1: A<math>\beta</math> sliding window controls</i> .....                                                                                       | 8  |
| <i>Appendix Figure S2: Binding of A<math>\beta</math> oligomers in peptide microarrays through 3 different randomizations</i> .....                                | 9  |
| <i>Appendix Figure S3: Normalized ThT kinetics of A<math>\beta</math> in presence and absence of homologue peptides derived from human proteins</i> .....          | 10 |
| <i>Appendix Figure S4: ThT kinetics of 10<math>\mu</math>M homologue peptides in absence of A<math>\beta</math></i> .....                                          | 11 |
| <i>Appendix Figure S5: TEM images of A<math>\beta</math> fibrils made in presence of homologous peptides</i> ...12                                                 |    |
| <i>Appendix Figure S6: TEM images of peptides in absence of A<math>\beta</math></i> .....                                                                          | 13 |
| <i>Appendix Figure S7: Length distribution of A<math>\beta</math> fibrils in presence or absence of peptides as measured from TEM</i> .....                        | 14 |
| <i>Appendix Figure S8: Normalized pFTAA fluorescence spectrum of rA<math>\beta</math>1-42 fibrils made in presence or absence of homologue peptides</i> .....      | 15 |
| <i>Appendix Figure S9: Normalized Curcumin fluorescence spectrum of rA<math>\beta</math>1-42 fibrils made in presence and absence of homologues peptides</i> ..... | 16 |
| <i>Appendix Figure S10: Inducing A<math>\beta</math> aggregation by A<math>\beta</math> reverse seeds</i> .....                                                    | 17 |
| <i>Appendix Figure S11: FRAP of aggregates induced by constructs</i> .....                                                                                         | 18 |
| <i>Appendix Figure S12: Effect of expression of construct 9 in aggregation of A<math>\beta</math></i> .....                                                        | 19 |
| <i>Appendix Figure S13: Effect of expression of A<math>\beta</math> aggregation inducing constructs in other biosensor cell lines</i> .....                        | 20 |

## **Appendix Material and Methods.**

### ***Staining of A $\beta$ sliding window membranes with A $\beta$ antibodies***

The membranes were blocked overnight in 1% BSA in PBS-T, then were incubated with Anti- $\beta$ -amyloid 6E10 (Biolegend, 803001) or 4G8 (Biolegend, 800701) or 12F4 (Biolegend, 805509) in 1% BSA in PBS-T for 1h. Membranes were washed three times and were incubated with anti-mouse HRP (Promega). Finally, membranes were washed in PBS-T for three times 5 min and developed through chemiluminescence using a ChemiDoc XRS (Bio-Rad).

### ***Seeding and transfection assay of Sup35NM and Tau biosensor cell line***

The N2A NM-GFP (Hofmann *et al*, 2013) or Tau RD P301S FRET Biosensor (ATCC-CRL-3275) (Sanders *et al*, 2014) cell line was cultured in DMEM medium, supplemented with 10% FBS at 37°C, and a 5% CO<sub>2</sub> atmosphere.

Briefly, the assay was performed in 96-well plate (PerkinElmer), previously coated for 30' with poly-L-lysine at 37°C and washed three times with PBS. Adhered cells were passed twice through a 22G needle and plated at 15.000 cells/well and 5h later were transfected with 100ng of DNA per well, using Lipofectamine 3000 (Invitrogen) according to the manufacturer. GFP+seeds was transfected with 100ng of DNA and after 17h with 100nM sup35NM seeds or Tau seeds.

After 41h of DNA transfection, the cells were fixed with 4% formaldehyde in PBS for 10 minutes. Cells were washed with PBS, block and permeabilize with 1%BSA, 0.2% TritonX-100 in PBS for 1hour. Cells were stained with 1:1000 HA-antibody (C29F4) Rabbit mAb (Cell signaling 3724) in 1%BSA in PBS for 1h. Cells were washed and stained with secondary Alexa Fluor 647 goat anti-rabbit (ThermoFisher A-21245) in 1%BSA in PBS for 1h. Cells were nuclei stained with 1:5000 DAPI (ThermoFisher D1306) in 1%BSA in PBS for 1h. Cells were washed and plates were imaged using Operetta CLS. For NM-GFP cells: For each well 17 fields were imaged by using the channels Digital Phase Contrast, Alexa647 (Ex:615-645, Em:655-760), EGFP (Ex:460-490, Em: 500-550), DAPI (Ex:355-385, Em: 430-500). The images were analyzed by Operetta CLS. Nuclei was detected with DAPI, Cytoplasm with Digital Phase Contrast. Spots (GFP) measured on ROIs: Nuclei and Cell. For Tau biosensor: For each well 17 fields were imaged by using the channels Digital Phase Contrast, Alexa647 (Ex:615-645, Em:655-760), DAPI (Ex:355-385, Em: 430-500), Tau YFP (Ex: 490-515, Em: 525-580). The images were



analyzed by Operetta CLS. Nuclei was detected with DAPI, Cytoplasm with Digital Phase Contrast. Spots (YFP) measured on ROIs: Nuclei and Cell. Alexa647 intensity was measured for each cell identified. The baseline Alex647 was calculated in PBS treated cells. Every cell with higher fluorescence was identified as transfected with our plasmids. The number of spots were identified in cells with and without Alexa647 fluorescence. Number of spots per cell was calculated from Number of spots/ number of cells for Alexa647 positive and negative cells. Statistical significance was calculated using Ordinary one-way ANOVA with Dunett multiple comparison correction. GraphPad was used for statistics and graphs.

### ***Transfection with amyloidogenic proteins of biosensor A $\beta$ 1-42 cell line***

The biosensor mcherry-A $\beta$ 1-42 HEK293T cell line was cultured in DMEM medium, supplemented with 10% FBS at 37°C, and a 5% CO<sub>2</sub> atmosphere.

Briefly, the assay was performed in 96-well plate (PerkinElmer), previously coated for 30' with poly-L-lysine at 37°C and washed three times with PBS. Adhered cells were passed twice through a 22G needle and plated at 15.000 cells/well and 5h later were transfected with 100ng of DNA per well, using Lipofectamine 3000 (Invitrogen) according to the manufacturer. Plasmids for 6,9,10 and Tau were produced from Twist Bioscience. pcDNA6 asyn WT was a gift from Hilal Lashuel (Addgene plasmid # 107425 ; <http://n2t.net/addgene:107425> ; RRID:Addgene\_107425). Generation of pCDNA4-SOD1-Myc-His6 A4V was described before (Claes *et al*, 2019).

After 41h of DNA transfection, the cells were fixed with 4% formaldehyde in PBS for 10 minutes. Cells were washed with PBS, block and permeabilize with 1%BSA, 0.2% TritonX-100 in PBS for 1hour. Cells were stained with 1:1000 HA-antibody (C29F4) Rabbit mAb (Cell signaling 3724) for staining 6,9,10 constructs, 1:1000 tau antibody (Agilent, A002401-2) for tau construct,  $\alpha$ -synuclein antibody (14H2L1, Thermo 701085) for  $\alpha$ -synuclein, c-Myc monoclonal antibody (9E10, ThermoFisher 13-2500) for SOD1 construct in 1%BSA in PBS for 1h. Cells were washed and stained with secondary Alexa Fluor 647 goat anti-rabbit (ThermoFisher A-21245) or Alexa Fluor 647 goat anti-mouse (ThermoFisher A-21235) in 1%BSA in PBS for 1h. Cells were nuclei stained with 1:5000 Dapi (ThermoFisher D1306) in 1%BSA in PBS for 1h. Cells were washed and plates were imaged using Operetta CLS. For transfected cells: For each well 17 fields were imaged by using the channels Digital Phase Contrast, mCherry (Ex:530-560, Em:570-650), DRAQ7 (Ex:615-645, Em: 655-705), Alexa647

(Ex:615-645, Em:655-760). The images were analyzed by Operetta CLS. Nuclei was detected with DRAQ7, Cytoplasm with Digital Phase Contrast. Spots measured on ROIs: Nuclei and Cell. Alexa647 intensity was measured for each cell identified. The baseline Alexa647 was calculated in PBS treated cells. Every cell with higher fluorescence was identified as transfected with our plasmids. The number of spots were identified in cells with and without Alexa647 fluorescence. Number of spots per cell was calculated from Number of spots/ number of cells for Alexa647 positive and negative cells. Statistical significance was calculated using Ordinary one-way ANOVA with Dunnett multiple comparison correction and unpaired t-test for comparison between transfected/nontransfected cells. GraphPad was used for statistics and graphs.

### ***Subcellular localization***

For the list of plaque proteins identified by Xiong et al (Xiong *et al*, 2019a, b), we retrieved subcellular location information from Uniprot (UniProt, 2008). Specifically, we used the information listed in Uniprot's "Subcellular location [CC]" feature. The subcellular location annotations were then filtered to only retain the location terms in Uniprot's standardized subcellular location vocabulary. To reduce complexity and increase interpretability of the annotations, subcellular location terms were grouped thusly:

#### ***Cytoplasmic proteins:***

Cytoplasmic vesicle, Centrosome, T-tubule, Cell projection, Preautophagosomal structure, Microsome, Endomembrane system, cis-Golgi network, Cytolytic granule, Lysosome lumen, Rough endoplasmic reticulum, Melanosome, trans-Golgi network, Lysosome membrane, Cytoplasmic vesicle membrane, Midbody ring, Autolysosome, Lysosome, Endoplasmic reticulum membrane, Nucleoplasm, trans-Golgi network membrane, Midbody, Vacuole, Nucleus speckle, Cajal body, Cytoplasmic granule, Nucleus membrane, COPII-coated vesicle, Cleavage furrow, Zymogen granule, Endoplasmic reticulum-Golgi intermediate compartment, Nucleus, Early endosome membrane, Endoplasmic reticulum, Cortical granule, Perikaryon, Lipid droplet, Nucleus matrix, Recycling endosome, Cytoplasm, Mitochondrion, PML body, Sarcoplasm, Late endosome, Z line, P-body, Photoreceptor inner segment, Mitochondrion matrix, Mitochondrion outer membrane, Stress granule, Golgi stack, Golgi outpost, Golgi apparatus, Early endosome, Chromosome, Endosome, Endosome membrane, Cytosol

#### ***Membrane proteins:***

Membrane raft, Tight junction, Cell membrane, Cell surface, Cell junction, Apical cell membrane, Basolateral cell membrane, Lateral cell membrane, Membrane

*Secreted/extracellular proteins:*

Secreted, Postsynaptic density

Proteins were then grouped into one of 7 categories, consisting of the combinations between the three classifications above: Strictly cytoplasmic, strictly membrane, strictly extracellular, cytoplasmic and membrane, cytoplasmic and extracellular, membrane and extracellular, and cytoplasmic, membrane and extracellular combined. For each of these groups, the proportions in the list of proteins identified by Xiong et al were calculated.

Claes F, Rudyak S, Laird AS, Louros N, Beerten J, Debulpaep M, Michiels E, van der Kant R, Van Durme J, De Baets G *et al* (2019) Exposure of a cryptic Hsp70 binding site determines the cytotoxicity of the ALS-associated SOD1-mutant A4V. *Protein Eng Des Sel* 32: 443-457

Hofmann JP, Denner P, Nussbaum-Krammer C, Kuhn PH, Suhre MH, Scheibel T, Lichtenthaler SF, Schatzl HM, Bano D, Vorberg IM (2013) Cell-to-cell propagation of infectious cytosolic protein aggregates. *Proc Natl Acad Sci U S A* 110: 5951-5956

Sanders DW, Kaufman SK, DeVos SL, Sharma AM, Mirbaha H, Li A, Barker SJ, Foley AC, Thorpe JR, Serpell LC *et al* (2014) Distinct tau prion strains propagate in cells and mice and define different tauopathies. *Neuron* 82: 1271-1288

UniProt C (2008) The universal protein resource (UniProt). *Nucleic Acids Res* 36: D190-195

Xiong F, Ge W, Ma C (2019a) Quantitative proteomics reveals distinct composition of amyloid plaques in Alzheimer's disease. *Alzheimers Dement* 15: 429-440

Xiong F, Ge W, Ma C (2019b) Quantitative proteomics reveals distinct composition of amyloid plaques in Alzheimer's disease. [DATASET]. *Alzheimers Dement* 15: 429-440

**Appendix Table S1**

| Row | Column | Name               | Sequence          |
|-----|--------|--------------------|-------------------|
| A   | 1      | >abeta1            | DAEFRHDSGYEVGGSS  |
| A   | 2      | >abeta2            | AEFRHDSGYEVHGGSS  |
| A   | 3      | >abeta3            | EFRHDSGYEVHHGGSS  |
| A   | 4      | >abeta4            | FRHDSGYEVHHQGGSS  |
| A   | 5      | >abeta5            | RHDSGYEVHHQKGGSS  |
| A   | 6      | >abeta6            | HDSGYEVHHQKLGGS   |
| A   | 7      | >abeta7            | DSGYEVHHQKLVGGSS  |
| A   | 8      | >abeta8            | SGYEVHHQKLVFGGSS  |
| A   | 9      | >abeta9            | GYEVHHQKLVFFGGSS  |
| A   | 10     | >abeta10           | YEVHHQKLVFFAGGS   |
| B   | 1      | >abeta11           | EVHHQKLVFFAEGGS   |
| B   | 2      | >abeta12           | VHHQKLVFFAEDGGSS  |
| B   | 3      | >abeta13           | HHQKLVFFAEDVGGSS  |
| B   | 4      | >abeta14           | HQKLVFFAEDVGGGSS  |
| B   | 5      | >abeta15           | QKLVFFAEDVGSGGSS  |
| B   | 6      | >abeta16           | KLVFFAEDVGSNGGSS  |
| B   | 7      | >abeta17           | LVFFAEDVGSNKGSS   |
| B   | 8      | >abeta18           | VFFAEDVGSNKGSS    |
| B   | 9      | >abeta19           | FFAEDVGSNKGAGGS   |
| B   | 10     | >abeta20           | FAEDVGSNKGAISS    |
| C   | 1      | >abeta21           | AEDVGSNKGAISS     |
| C   | 2      | >abeta22           | EDVGSNKGAISS      |
| C   | 3      | >abeta23           | DVGSNKGAIIGLSS    |
| C   | 4      | >abeta24           | VGSNKGAIIGLMSS    |
| C   | 5      | >abeta25           | GSNKGAIIGLMVSS    |
| C   | 6      | >abeta26           | SNKGAIIGLMVGGSS   |
| C   | 7      | >abeta27           | NKGAIIGLMVGGGSS   |
| C   | 8      | >abeta28           | KGAIIGLMVGGVSS    |
| C   | 9      | >abeta29           | GAIIGLMVGGVVSS    |
| C   | 10     | >abeta30           | AIIGLMVGGVVIGSS   |
| D   | 1      | >abeta31           | IIGLMVGGVVIAGSS   |
| D   | 2      | >abeta12_F9P       | VHHQKLVFFPAEDGGSS |
| D   | 3      | >abeta15_F6P       | QKLVFFPAEDVGSGGSS |
| D   | 4      | >abeta24_I9P       | VGSNKGAIPLMGGSS   |
| D   | 5      | >abeta26_I7P       | SNKGAIPLMVGSS     |
| D   | 6      | >abeta11_scrambled | VKEFHEQALFHVGGSS  |
| D   | 7      | >abeta14_scrambled | FGDLEVQAKVHFGSS   |
| D   | 8      | >abeta25_scrambled | IKGALNVSIGMGGSS   |
| D   | 9      | >abeta27_scrambled | INIGKLGAVMGGSS    |
| D   | 10     | >abeta29_scrambled | IVGAGMGLLVIGSS    |

**Appendix Table S1:** Sequences printed in A $\beta$  sliding window membranes

**Appendix Table S2**

| PLAK |        |                                   |                  |
|------|--------|-----------------------------------|------------------|
| Row  | Column | Name                              | Sequence         |
| A    | 1      | O00322-1;O00322-2                 | SGLSLFAETIWGGG   |
| A    | 2      | Q92985-2;Q92985-4                 | DFRVFFQELVEGGG   |
| A    | 3      | random121                         | TSSQRFCDSDAGGG   |
| A    | 4      | random405                         | ERSQQQPLVCAGGG   |
| A    | 5      | Q86X55-2;A6NN38                   | SGILSFFAAQAGGG   |
| A    | 6      | random185                         | EHQPSCTLSAEEGGG  |
| A    | 7      | random457                         | ESLKKELDTDRPGGG  |
| A    | 8      | random258                         | ERSVCGEGCGKSGGG  |
| A    | 9      | O00322-1;O00322-2                 | SGLSLFAETIWGGG   |
| A    | 10     | random240                         | CLPKTQEQCAKGGG   |
| A    | 11     | random84                          | TSRPPENSASAQGGG  |
| A    | 12     | P16144-1;P16144-2;P16144-5;B4E3N0 | HLLVFFSTESAFGGG  |
| A    | 13     | random165                         | QGGQVDCGEFQDGGG  |
| A    | 14     | O60412                            | FLLGFAEDSDGGG    |
| A    | 15     | random505                         | EENNRKIAEAQAGGG  |
| B    | 1      | Q86WR7-1;A6NDS2                   | DVLLFFETIDGGG    |
| B    | 2      | random114                         | STQKCSGQLSQEGGG  |
| B    | 3      | Q9BY11                            | KRLVFLKVELLGGG   |
| B    | 4      | random124                         | QAPTAARSEGDGCGG  |
| B    | 5      | Q92581;A8K160                     | ELLNFLAENFIGGG   |
| B    | 6      | random203                         | KLYPESQGSQTAGGG  |
| B    | 7      | random448                         | EQEQGQVHLEKGGG   |
| B    | 8      | Q68DE7                            | LPLTFEELKGGG     |
| B    | 9      | random224                         | GMDLINRETVHEGGG  |
| B    | 10     | Q8TCJ0-1;B4DYA3                   | EWKLMYFALQKGGG   |
| B    | 11     | random211                         | LQEQKDSQCLHVGGG  |
| B    | 12     | O95273-1                          | LRKLVGATLDGGG    |
| B    | 13     | Q15354                            | LPLVIFHELTKGGG   |
| B    | 14     | random126                         | DSEAINRQINLGGG   |
| B    | 15     | random451                         | EDAEGRLMEARKGGG  |
| C    | 1      | P10323                            | DWRLVFGAKEIGGG   |
| C    | 2      | Q6ZN22                            | LLKLLFFNESPGGG   |
| C    | 3      | random218                         | SREDTICLLQNEGGG  |
| C    | 4      | random416                         | EQEELRRELAKVGGG  |
| C    | 5      | O75110-1;O75110-2                 | ASLVFLHEFIDGGG   |
| C    | 6      | random406                         | PPTTPQNEIRAGGG   |
| C    | 7      | random424                         | DQLREQRKTLQEGGG  |
| C    | 8      | O60412                            | FLLGFAEDSDGGG    |
| C    | 9      | P16144-1;P16144-2;P16144-5;B4E3N0 | HLLVFFSTESAFGGG  |
| C    | 10     | O95273-1                          | LRKLVGATLDGGG    |
| C    | 11     | random225                         | MSYCEEHARSDPGGG  |
| C    | 12     | Q8IZU8                            | TLKLHFFQEVLLGGG  |
| C    | 13     | Q68DE7                            | LPLTFEELKGGG     |
| C    | 14     | random113                         | STGSTYGSQQKGGG   |
| C    | 15     | random418                         | LREEKVSQDRKPGGG  |
| D    | 1      | B4DWA5;B4DWN0                     | ILLRFAEDGGG      |
| D    | 2      | random125                         | DOANCRWAATEQGGG  |
| D    | 3      | random447                         | QSEEKRGITAREGGG  |
| D    | 4      | random426                         | EMWRQEKIREQGGG   |
| D    | 5      | O95497                            | KGTVFFDEFTFGGG   |
| D    | 6      | Q96QZ0                            | HLDVFFQEEFSGGG   |
| D    | 7      | random374                         | ITEQEQVAQISGGG   |
| D    | 8      | Q8IZU8                            | TLKLHFFQEVLLGGG  |
| D    | 9      | random427                         | ATCKDEKQKQEMGGG  |
| D    | 10     | P23786                            | AVLRFNFNEVFKGGG  |
| D    | 11     | random417                         | EAERLQVEKERLGGG  |
| D    | 12     | P23786                            | AVLRFNFNEVFKGGG  |
| D    | 13     | random                            | REAAQREVRCREGGG  |
| D    | 14     | Q8TCJ0-1;B4DYA3                   | EWKLMYFALQKGGG   |
| D    | 15     | random446                         | ERLTQQQDIRKDGGG  |
| E    | 1      | random495                         | ESELGRQKAENNGGG  |
| E    | 2      | random438                         | SEEEERAKAKHLAGGG |
| E    | 3      | random519                         | AQARQAEKQQHGGG   |
| E    | 4      | random466                         | LNQQLKREKEMEGGG  |
| E    | 5      | random500                         | ESQDHTPGQKREGGG  |
| E    | 6      | random494                         | QLQQQKNKEMEQQGGG |
| E    | 7      | random480                         | EQEQROALEQARGGG  |
| E    | 8      | random423                         | KCECEKSFQRKGGG   |
| E    | 9      | random508                         | IPEKDMDERRRLGGG  |
| E    | 10     | random439                         | EVARRKQIEIDGGG   |
| E    | 11     | random454                         | KAKIGRCETEERGGG  |
| E    | 12     | random441                         | GRDGSEKKIRECGGG  |
| E    | 13     | random515                         | VSENLRKEMEQQGGG  |
| E    | 14     | random455                         | EKVKEQLAAKPGGG   |
| E    | 15     | random501                         | ADAAEKIRKENPGGG  |

| AD  |        |                                   |                  |
|-----|--------|-----------------------------------|------------------|
| Row | Column | Name                              | Sequence         |
| A   | 1      | random426                         | EMWRQEKIREQGGG   |
| A   | 2      | random446                         | ERLTQQQDIRKDGGG  |
| A   | 3      | random427                         | ATCKDEKQKQEMGGG  |
| A   | 4      | random457                         | ESLKKELDTDRPGGG  |
| A   | 5      | random505                         | EENNRKIAEAQAGGG  |
| A   | 6      | random121                         | TSSQRFCDSDAGGG   |
| A   | 7      | random417                         | EAERLQVEKERLGGG  |
| A   | 8      | random424                         | DQLREQRKTLQEGGG  |
| A   | 9      | random418                         | LREEKVSQDRKPGGG  |
| B   | 1      | random495                         | ESELGRQKAENNGGG  |
| B   | 2      | random500                         | ESQDHTPGQKREGGG  |
| B   | 3      | Q15354                            | LPLVIFHELTKGGG   |
| B   | 4      | random494                         | QLQQQKNKEMEQQGGG |
| B   | 5      | random                            | REAAQREVRCREGGG  |
| B   | 6      | O00322-1;O00322-2                 | SGLSLFAETIWGGG   |
| B   | 7      | Q92985-2;Q92985-4                 | DFRVFFQELVEGGG   |
| B   | 8      | random405                         | ERSQQQPLVCAGGG   |
| B   | 9      | random423                         | KCECEKSFQRKGGG   |
| C   | 1      | random439                         | EVARRKQIEIDGGG   |
| C   | 2      | Q68DE7                            | LPLTFEELKGGG     |
| C   | 3      | random185                         | EHQPSCTLSAEEGGG  |
| C   | 4      | Q8TCJ0-1;B4DYA3                   | EWKLMYFALQKGGG   |
| C   | 5      | random258                         | ERSVCGEGCGKSGGG  |
| C   | 6      | Q92581;A8K160                     | ELLNFLAENFIGGG   |
| C   | 7      | random240                         | CLPKTQEQCAKGGG   |
| C   | 8      | Q9BY11                            | KRLVFLKVELLGGG   |
| C   | 9      | random84                          | TSRPPENSASAQGGG  |
| D   | 1      | random165                         | QGGQVDCGEFQDGGG  |
| D   | 2      | O60412                            | FLLGFAEDSDGGG    |
| D   | 3      | P16144-1;P16144-2;P16144-5;B4E3N0 | HLLVFFSTESAFGGG  |
| D   | 4      | O95273-1                          | LRKLVGATLDGGG    |
| D   | 5      | random114                         | STQKCSGQLSQEGGG  |
| D   | 6      | P10323                            | DWRLVFGAKEIGGG   |
| D   | 7      | random124                         | QAPTAARSEGDGCGG  |
| D   | 8      | Q96QZ0                            | HLDVFFQEEFSGGG   |
| D   | 9      | random203                         | KLYPESQGSQTAGGG  |
| E   | 1      | random224                         | GMDLINRETVHEGGG  |
| E   | 2      | Q8IZU8                            | TLKLHFFQEVLLGGG  |
| E   | 3      | random211                         | LQEQKDSQCLHVGGG  |
| E   | 4      | P23786                            | AVLRFNFNEVFKGGG  |
| E   | 5      | random416                         | EQEELRRELAKVGGG  |
| E   | 6      | B4DWA5;B4DWN0                     | ILLRFAEDGGG      |
| E   | 7      | Q6ZN22                            | LLKLLFFNESPGGG   |
| E   | 8      | random447                         | QSEEKRGITAREGGG  |
| E   | 9      | random441                         | GRDGSEKKIRECGGG  |

**Appendix Table S2:** Sequences printed in PLAK/AD membranes

Homologue peptides and unrelated peptides to Aβ KLVFFA and LVFFAE that printed in PLAK/AD membranes

## Appendix Figure S1

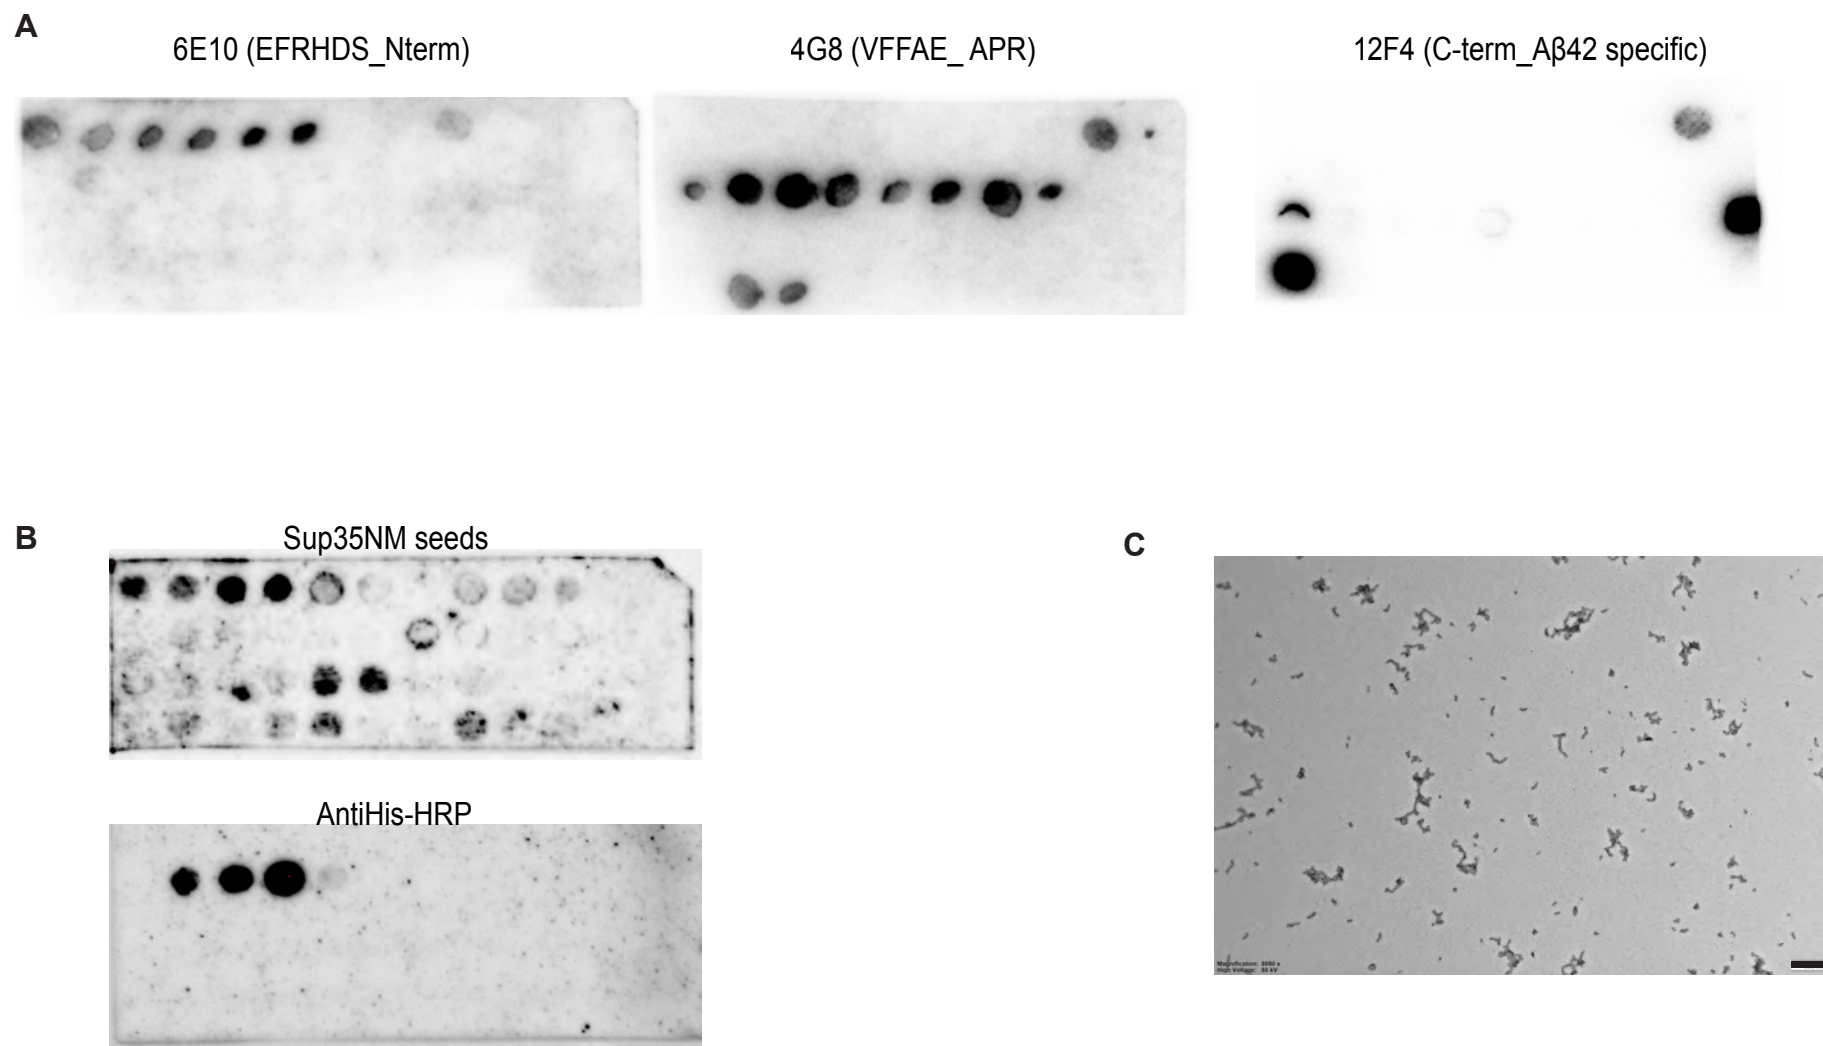

### Appendix Figure S1. A $\beta$ sliding window Controls

A. Staining of the membranes with A $\beta$  antibodies (6E10, 4G8, 12F4) confirms the presence of A $\beta$  sequence on the membranes. 6E10 recognizes EFRHDS sequence, 4G8 the VFFAE and 12F4 the c-terminus of A $\beta$ 1-42.

B. Incubation of A $\beta$  sliding windows with Sup35NM seeds (top membrane). High signal in N-terminal may come from His-HRP antibody used for detection. Bottom membrane shows binding of His-HRP in the membrane in absence of Sup35NM seeds.

C. TEM image of Sup35NM seeds. Scale bar: 500nm

# Appendix Figure S2

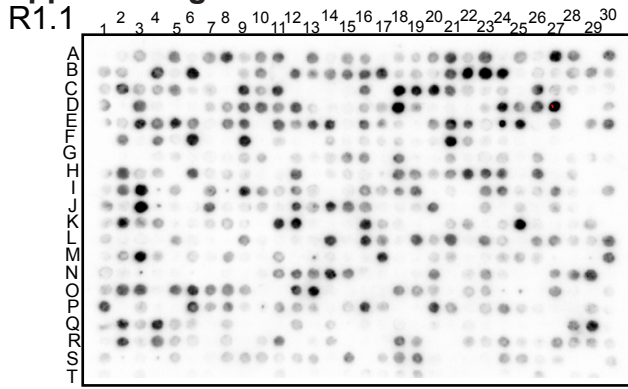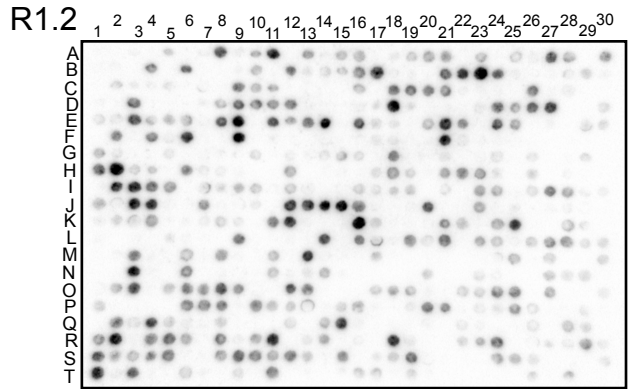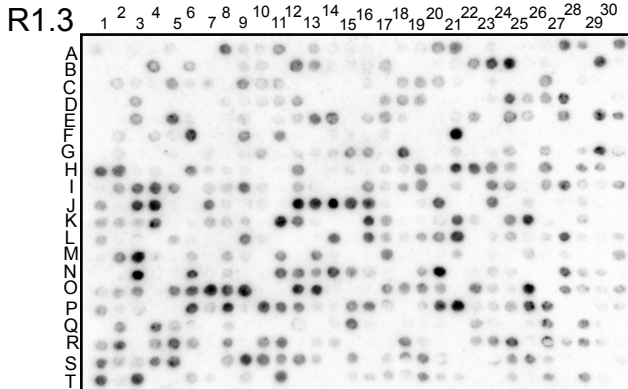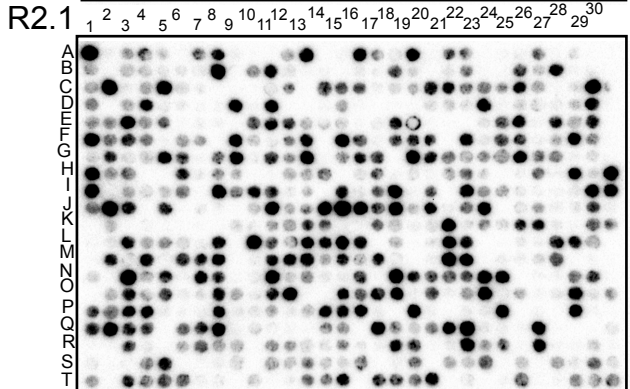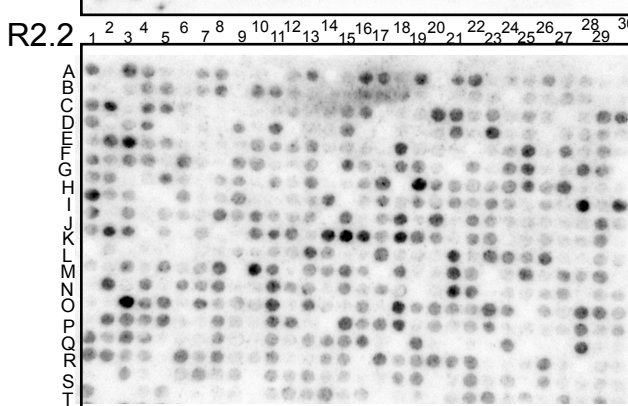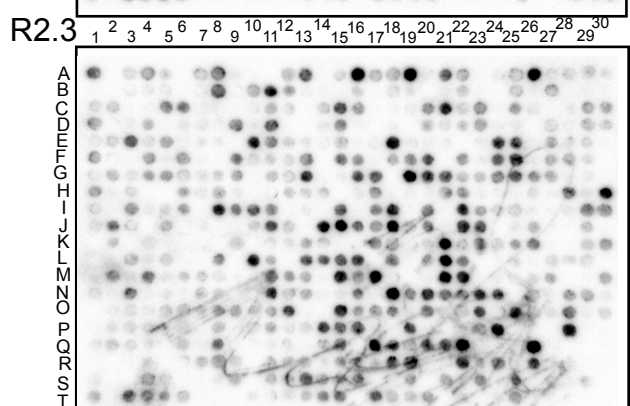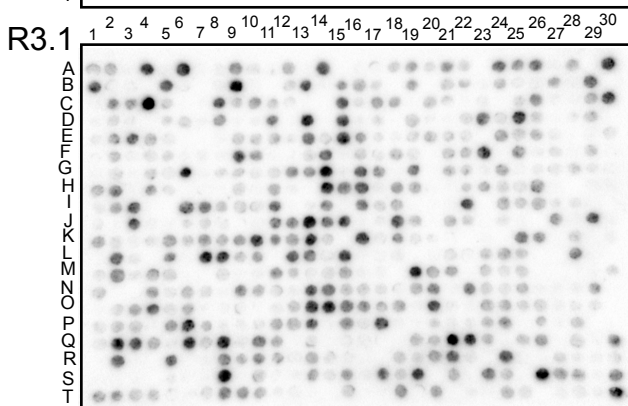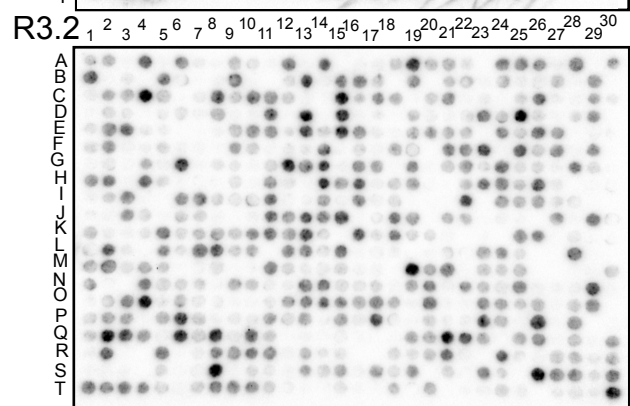

**Appendix Figure S2. Binding of A $\beta$  oligomers in peptide microarrays through 3 different randomizations.** R1,2,3 are membranes with the same peptides in different order. 3 repeat was done for R1 and 2, 3 repeats for R3. Sequences in DatasetEV1.



# Appendix Figure S3

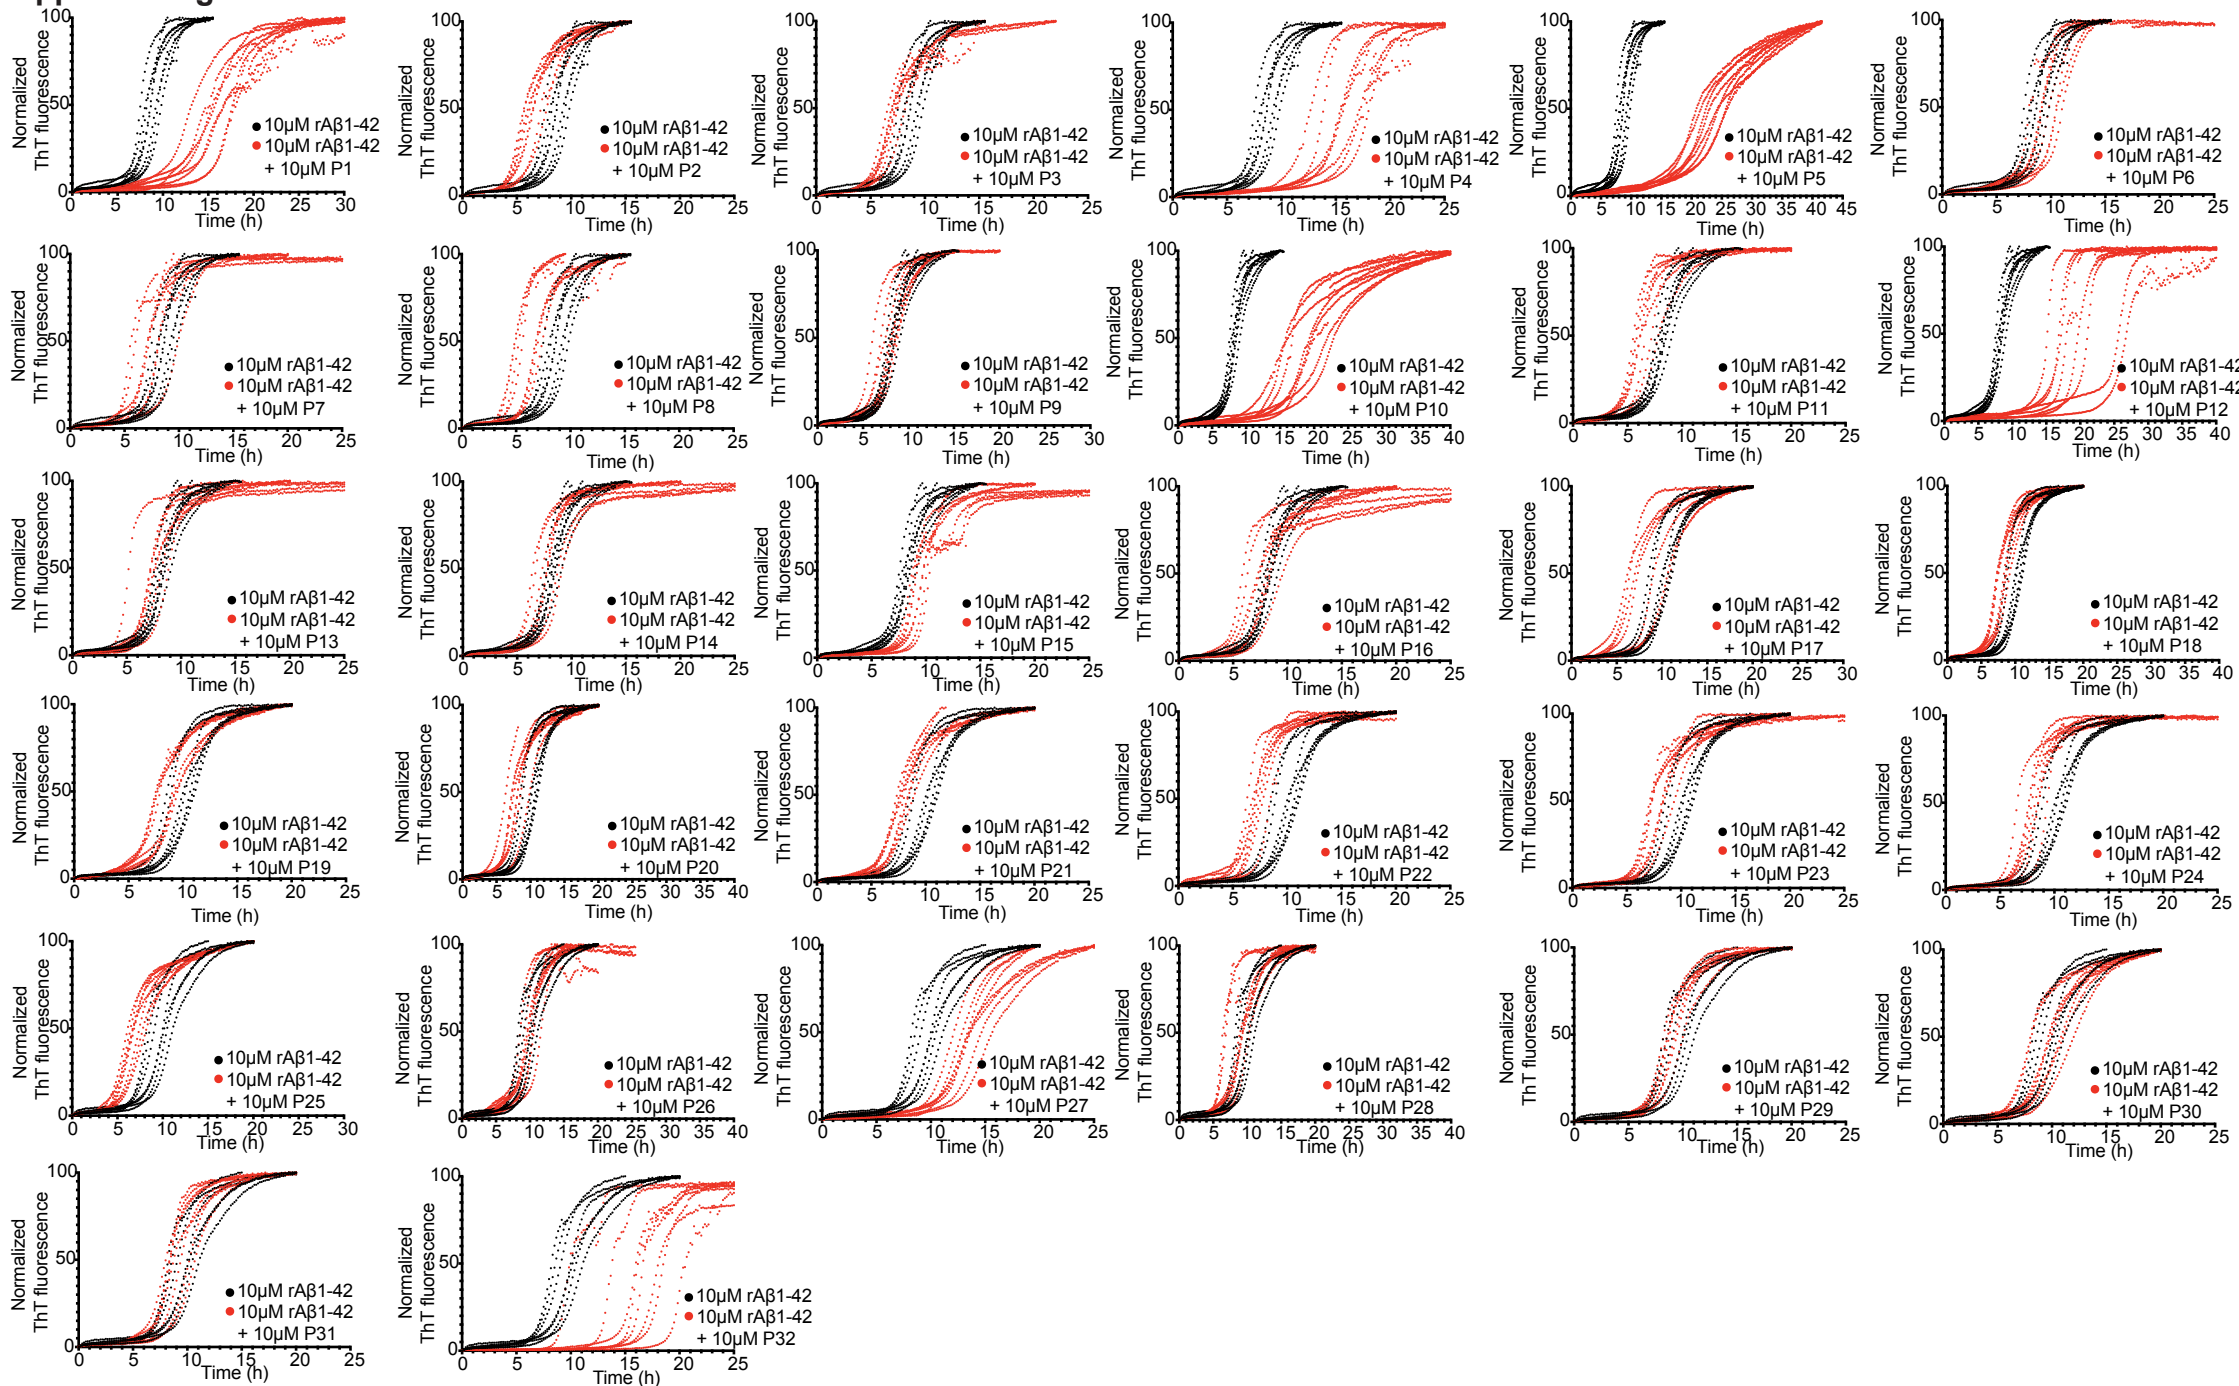

**Appendix Figure S3. Normalized ThT kinetics of Aβ in presence and absence of homologue peptides derived from human proteins.**

Black: 10µM rAβ1-42. Red: 10µM rAβ1-42+10µM peptide. n= 2 independent experiments with 4 repeats



# Appendix Figure S4

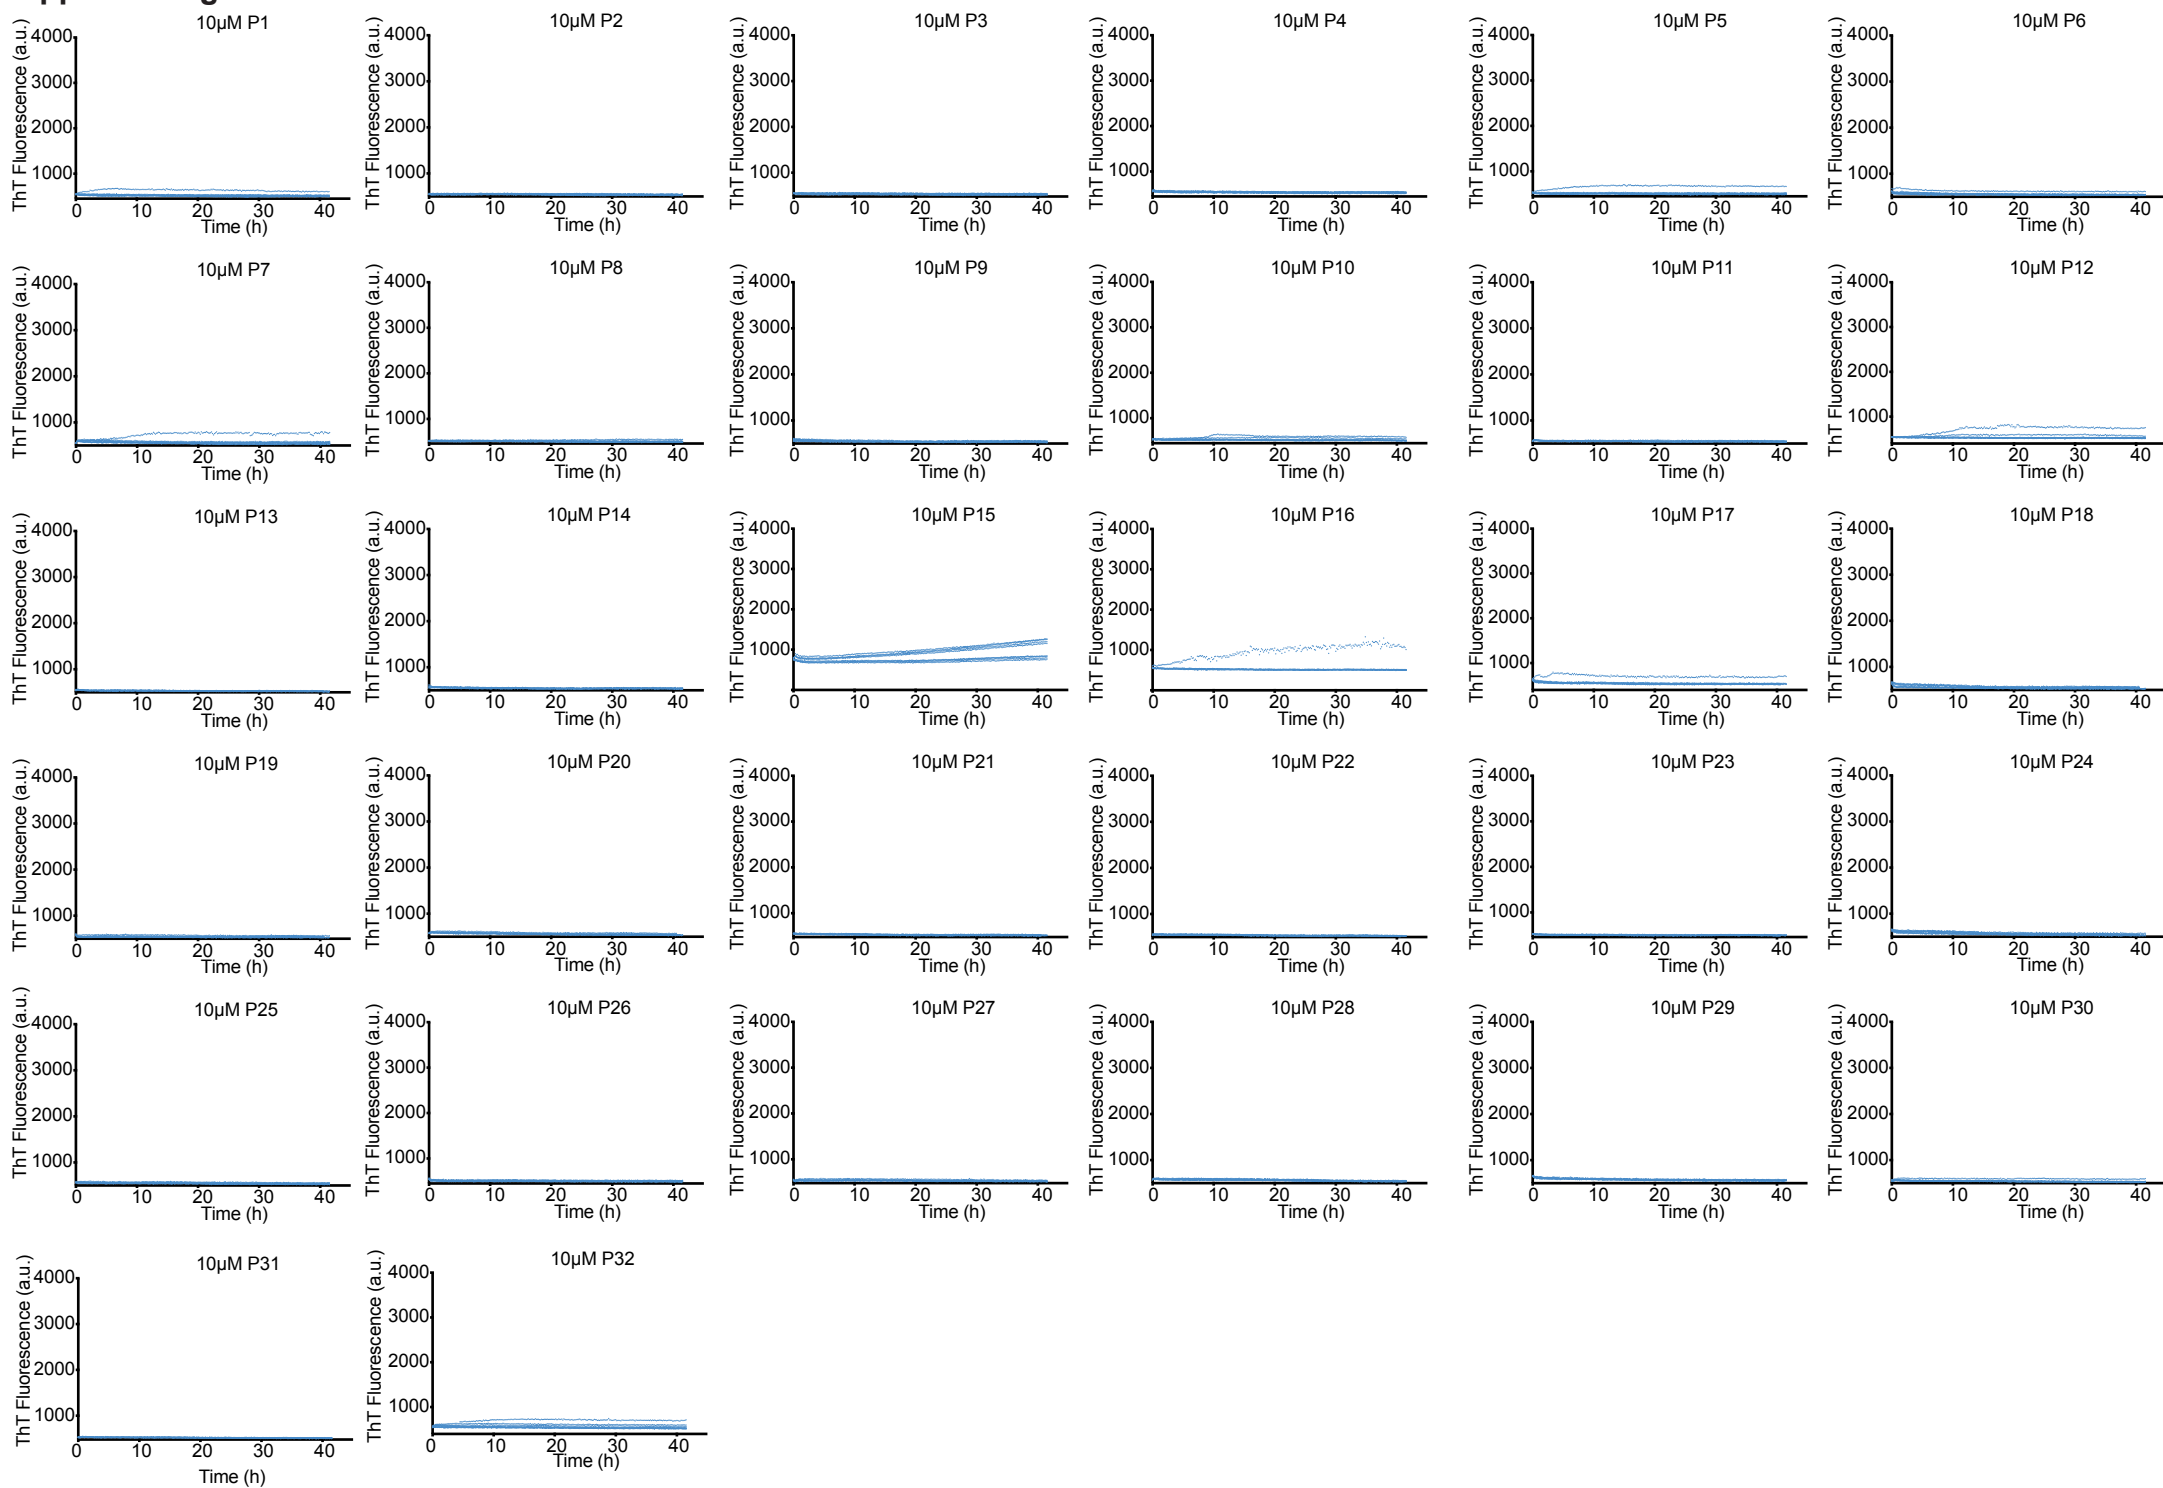

Appendix Figure S4: ThT kinetics of 10µM homologue peptides in absence of Aβ. n=2 independent experiments with 4 repeats

# Appendix Figure S5

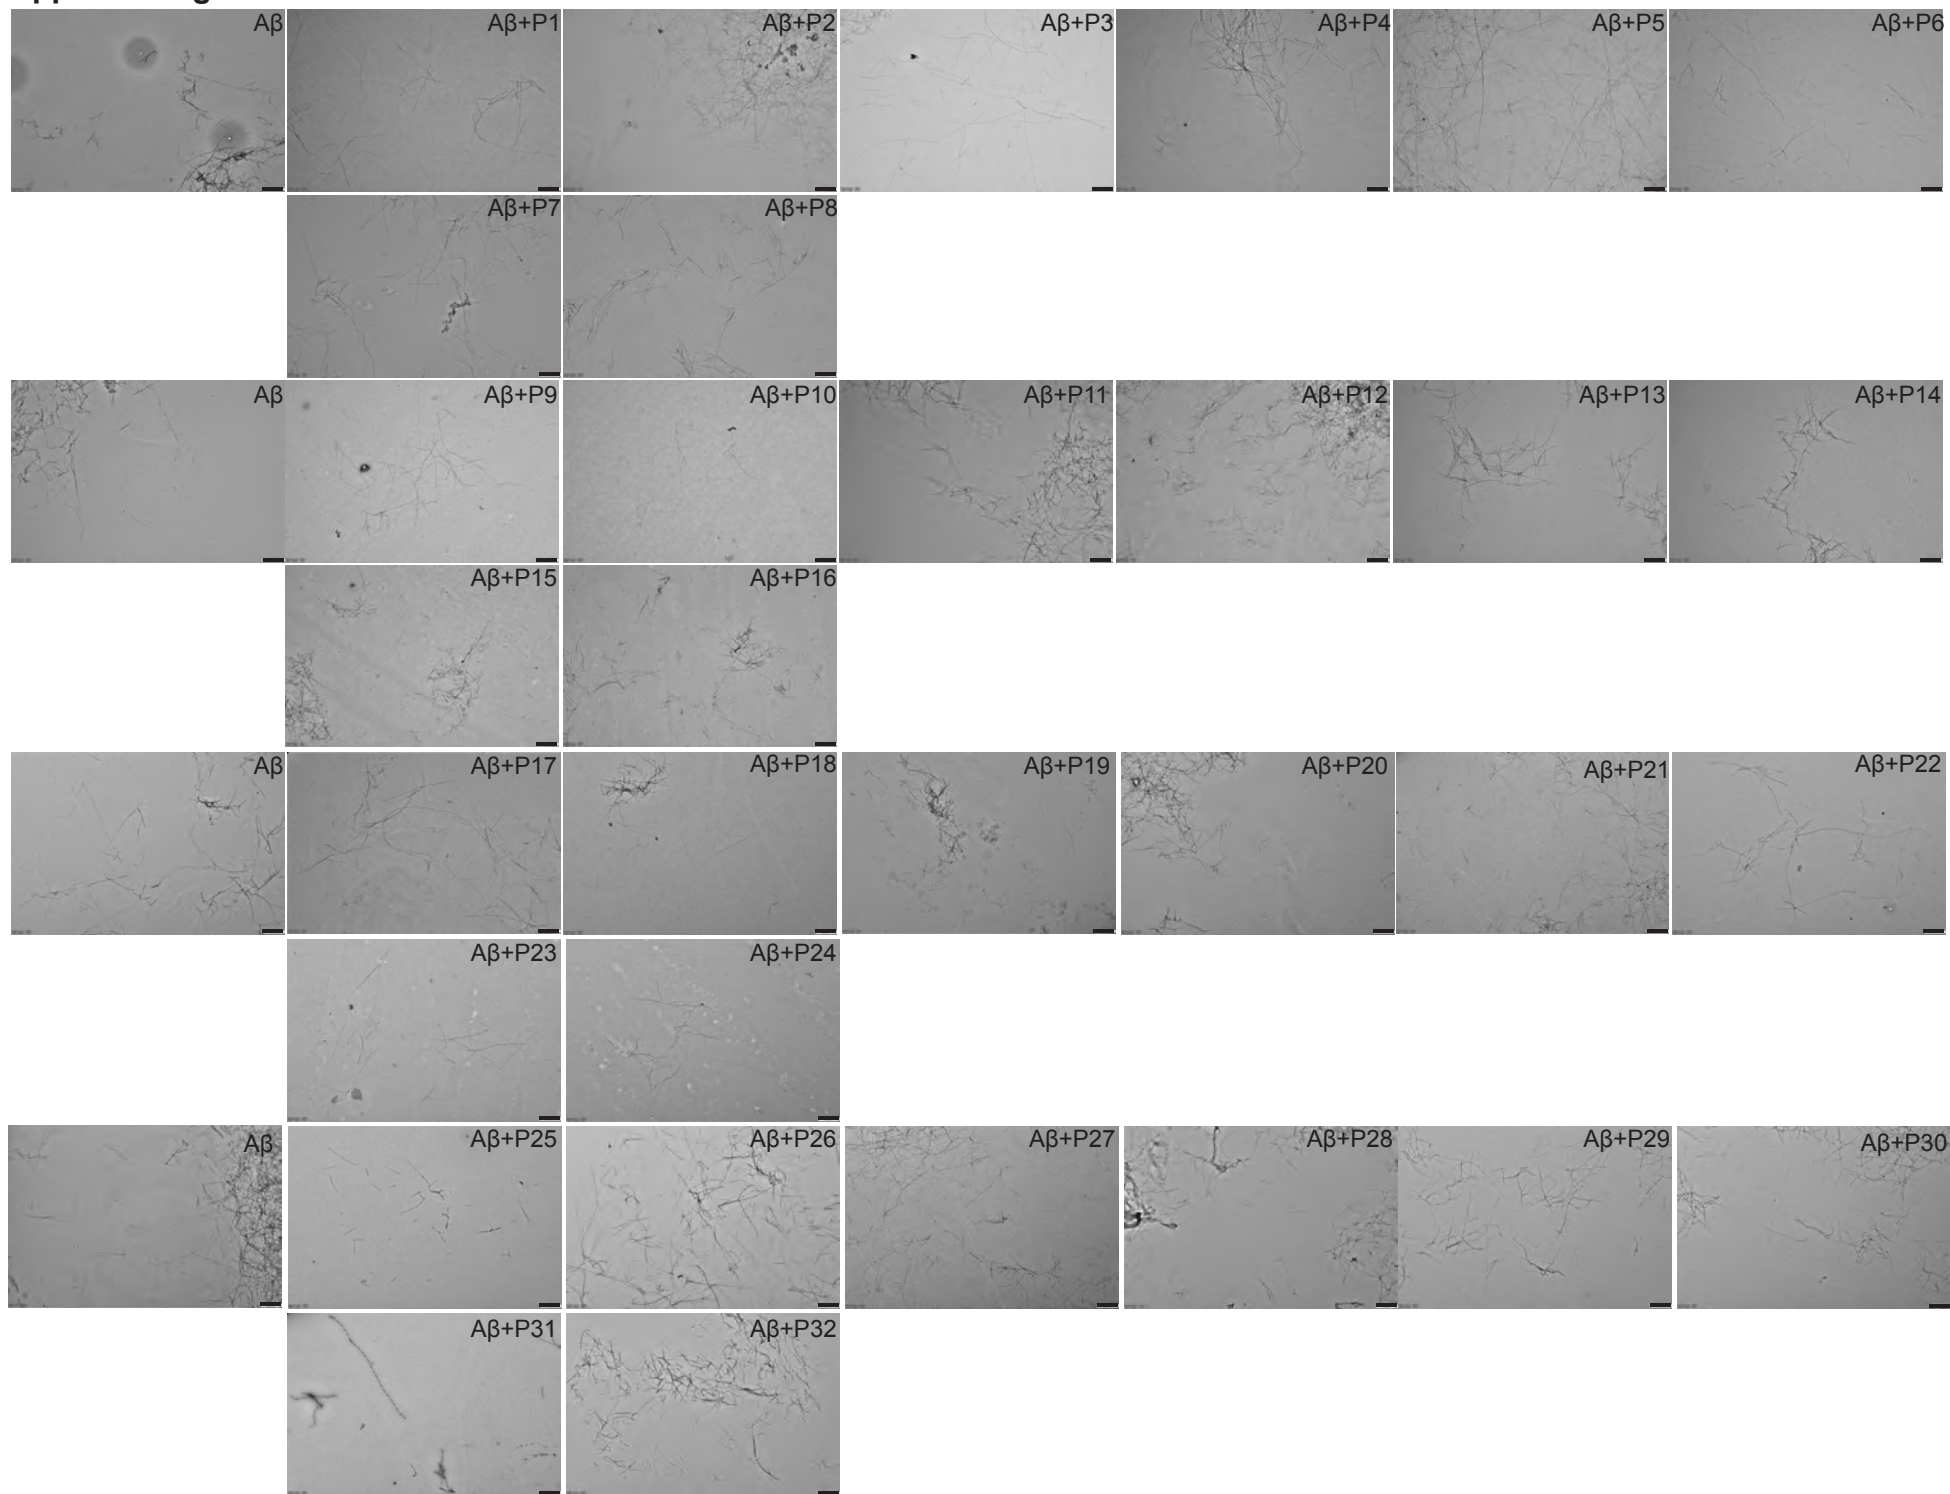

Appendix Figure S5: TEM images of Aβ fibrils made in presence of homologous peptides. (10μM rAβ1-42+10μM peptides). Scale bars: 500nm

Appendix Figures S6

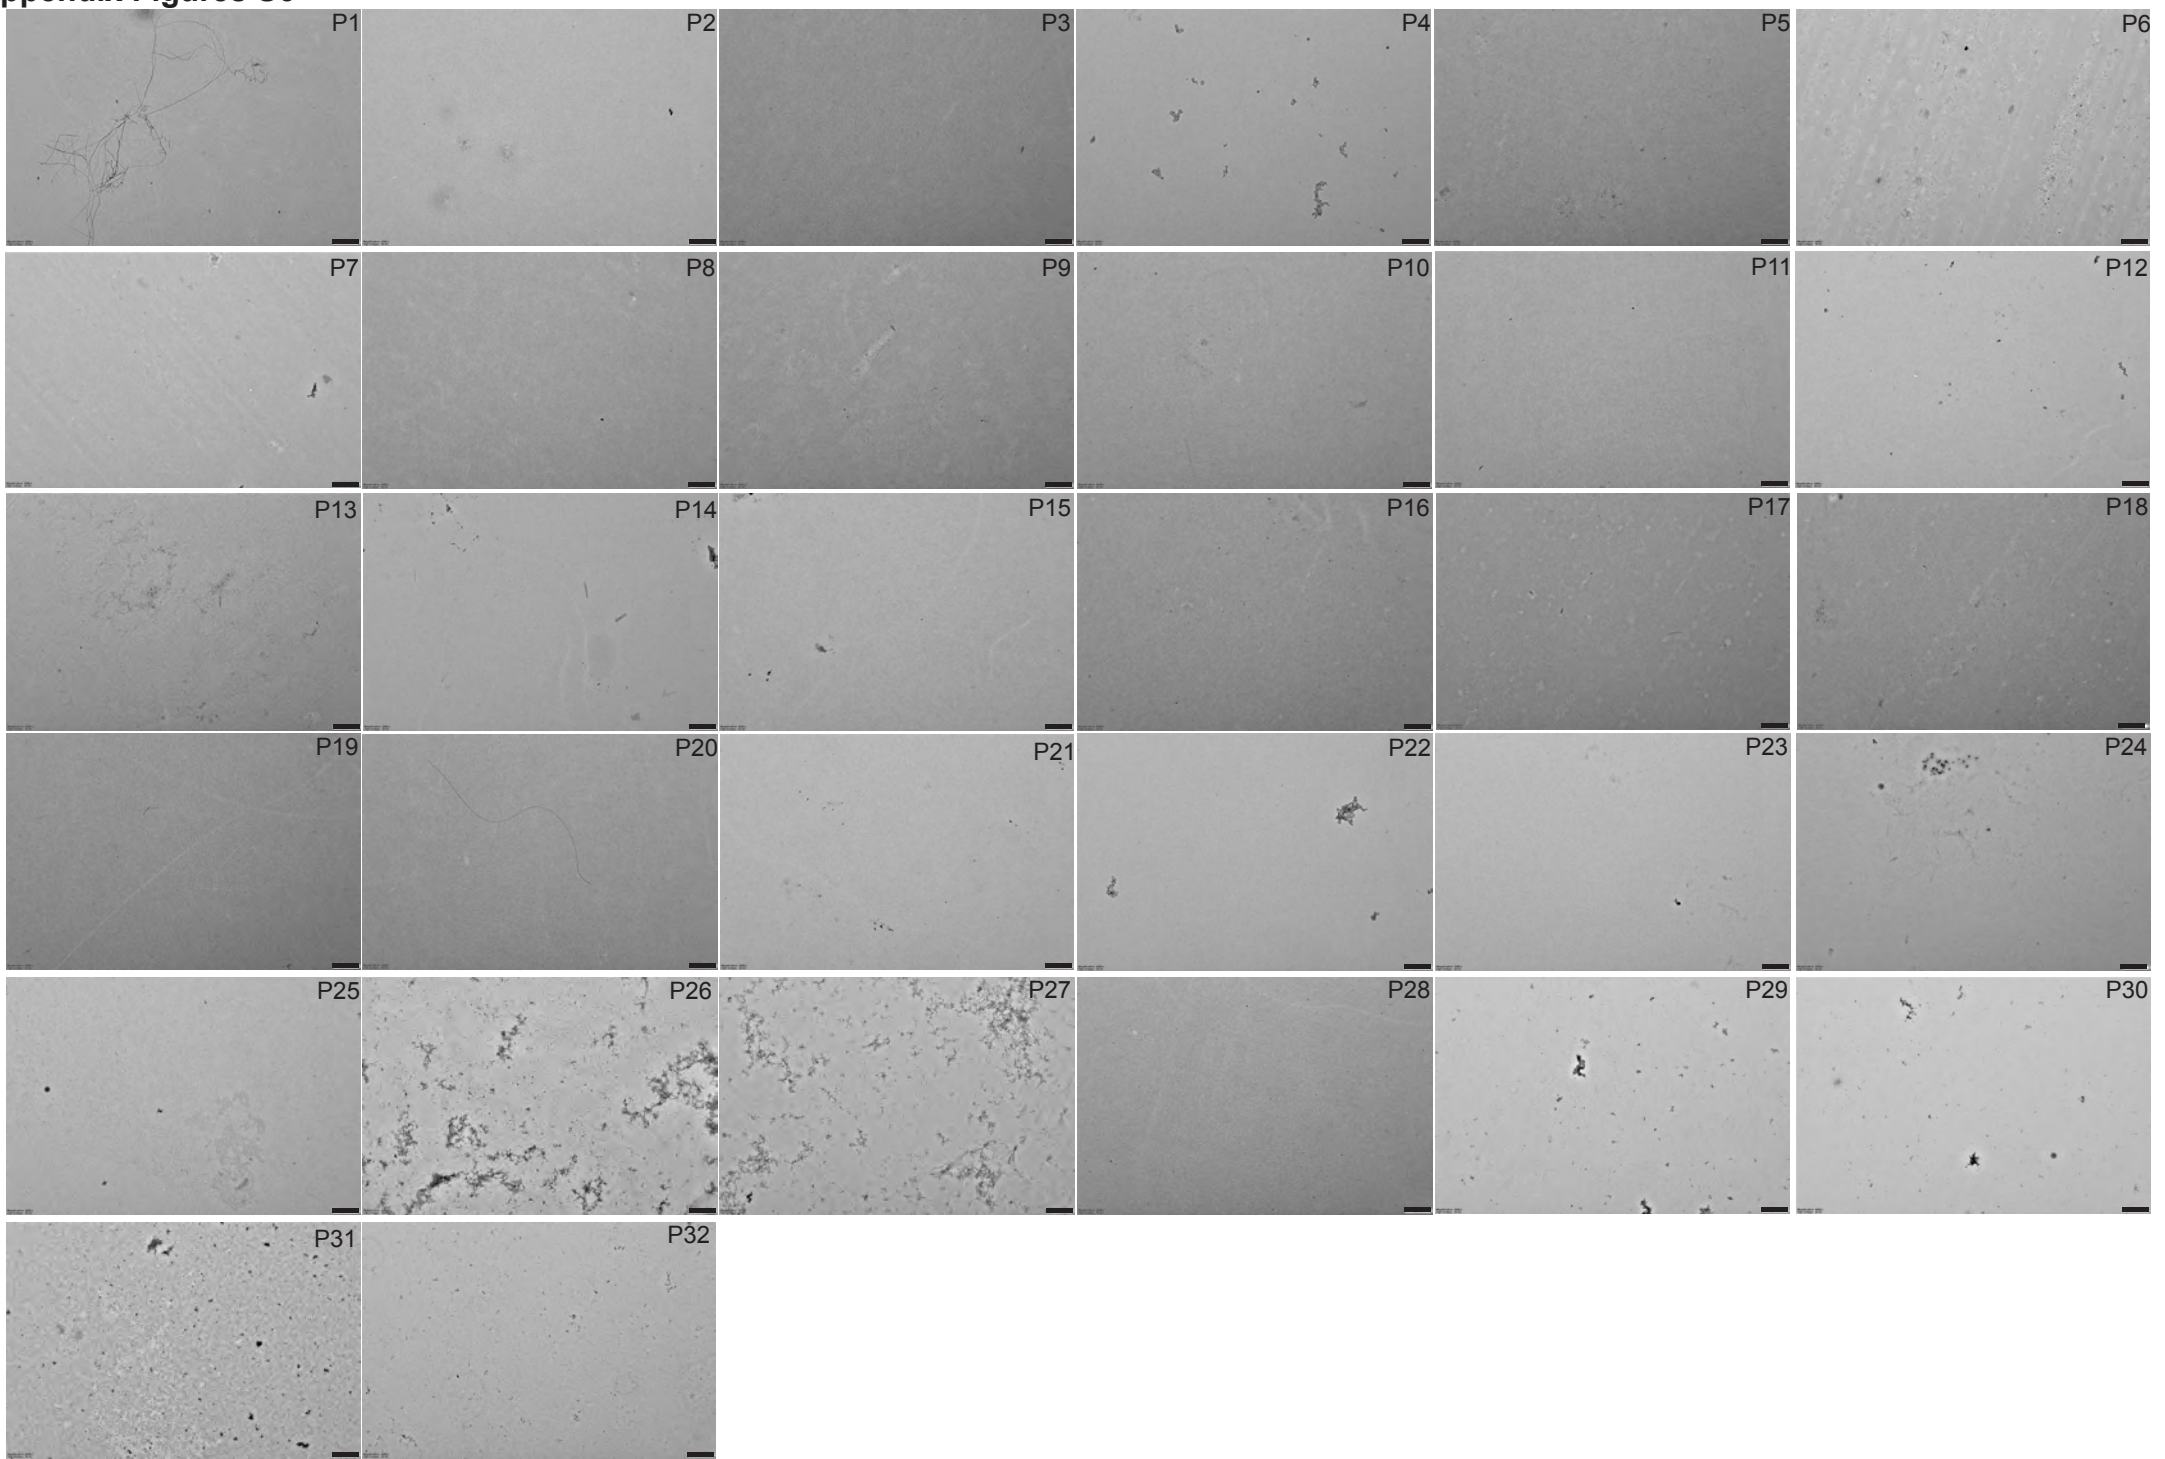

Appendix Figure S6: TEM images of peptides in absence of A $\beta$ . Scale bars: 500nm

# Appendix Figure S7

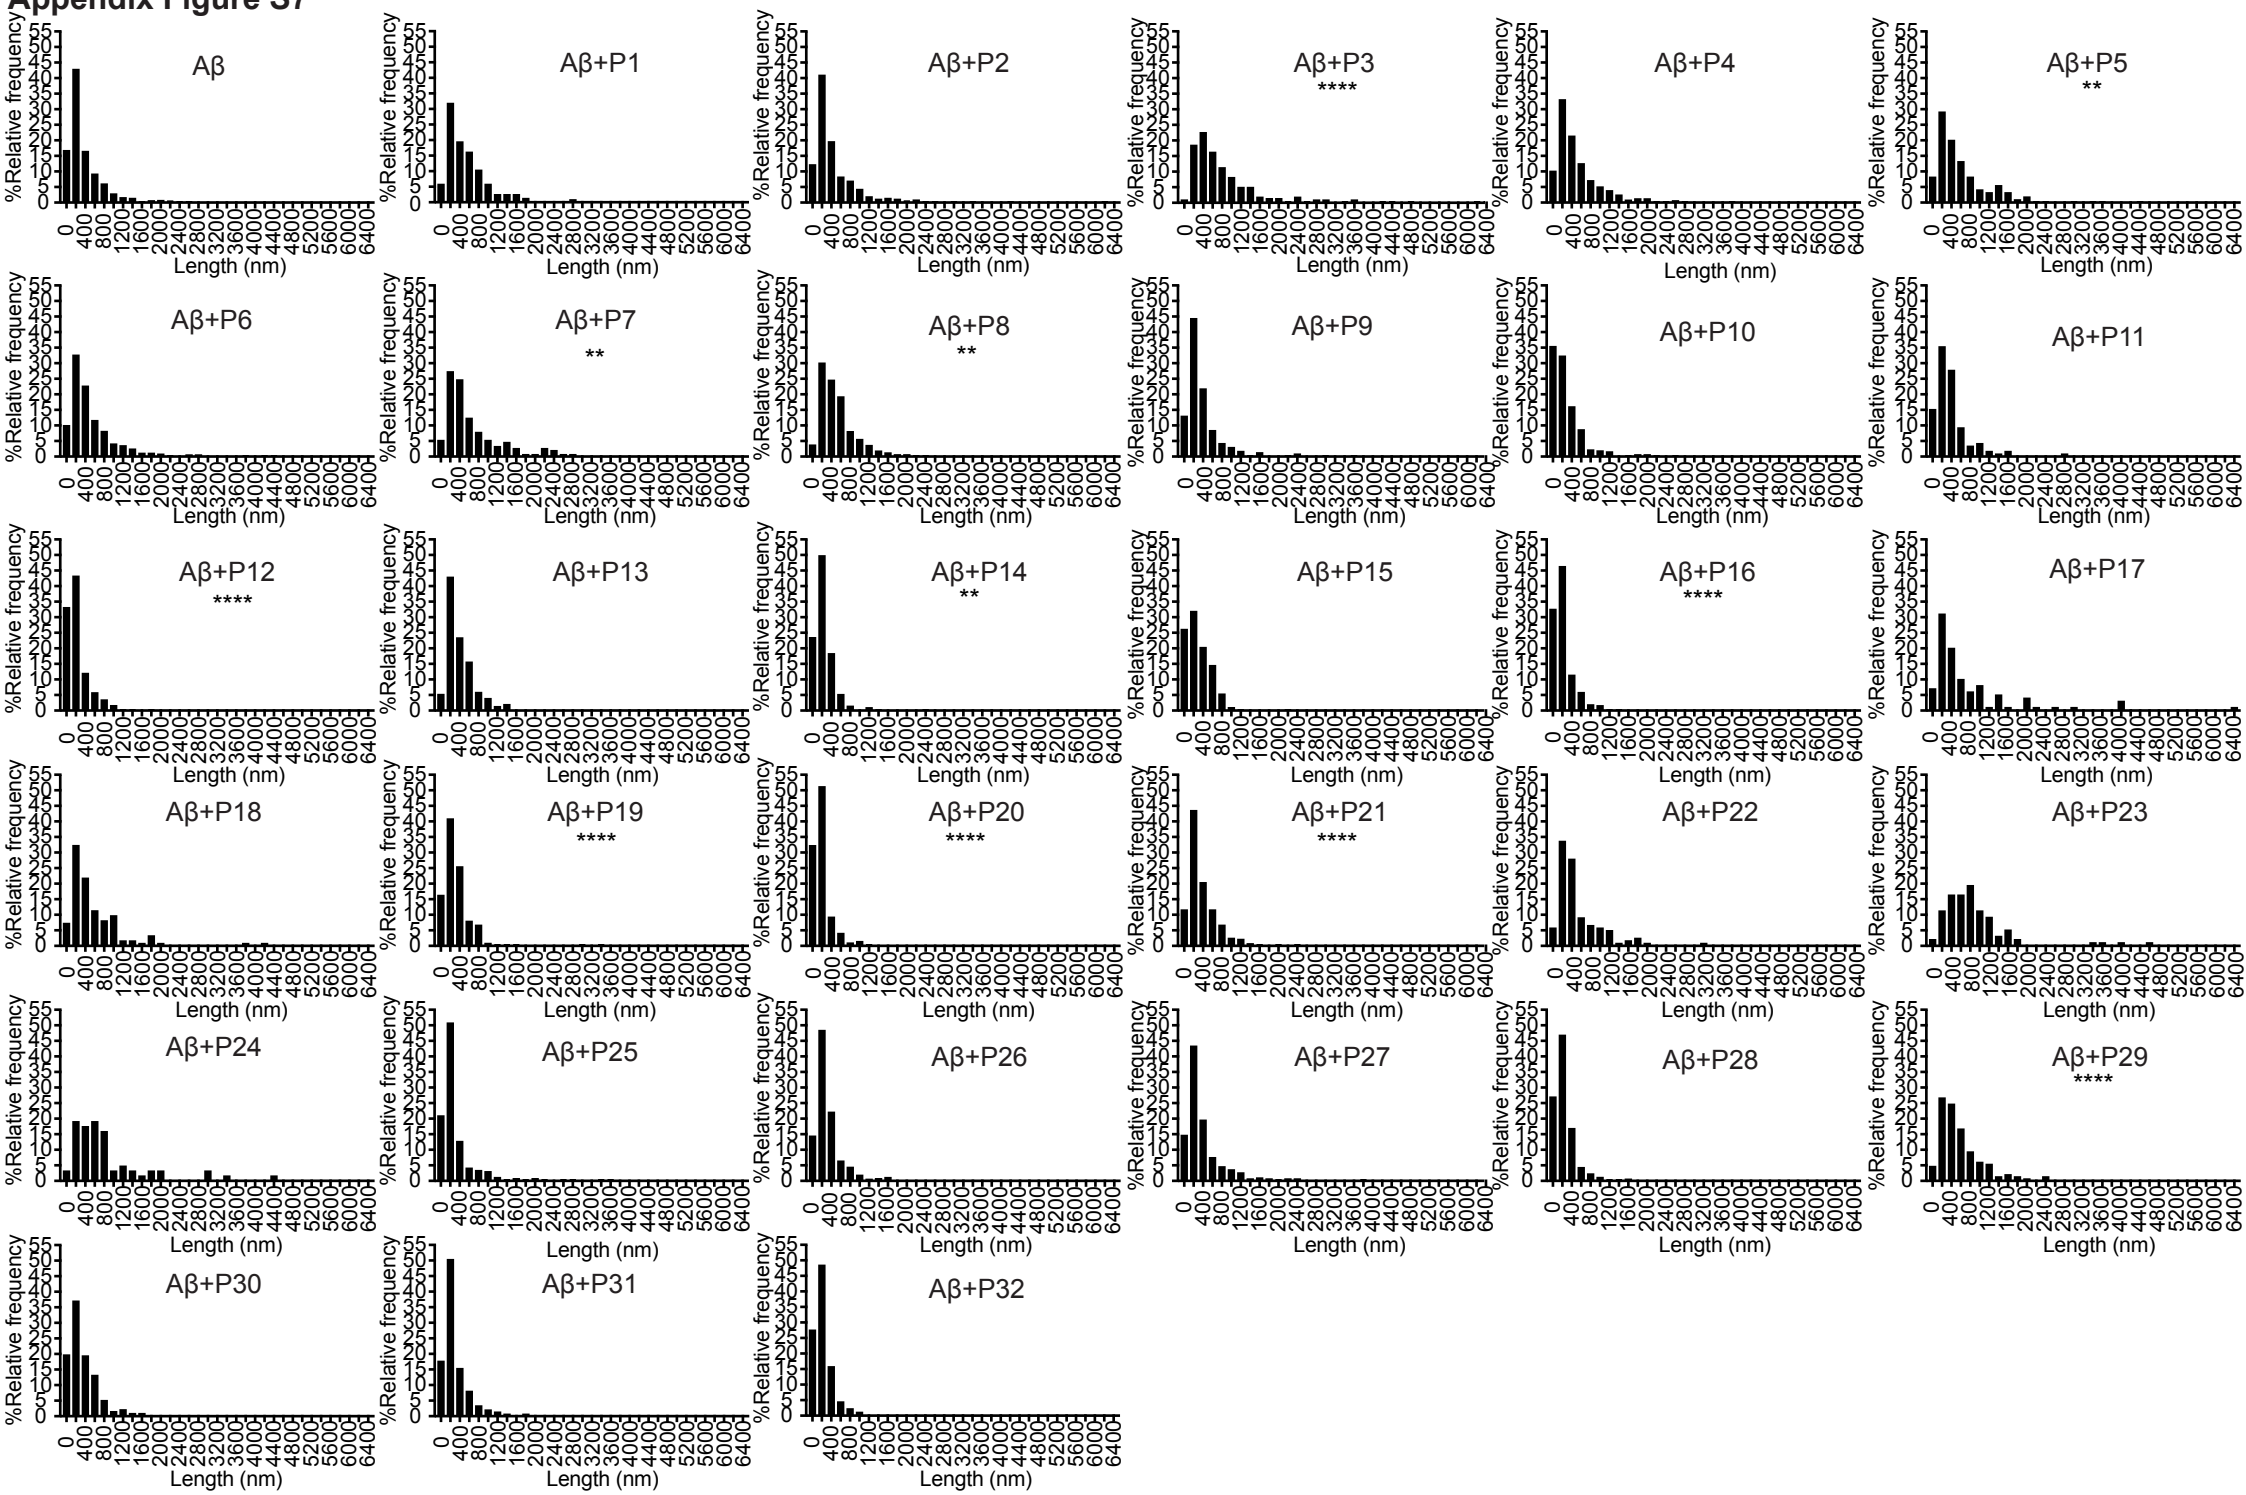

**Appendix Figure S7: Length distribution of Aβ fibrils in presence or absence of peptides as measured from TEM.**

Statistics: Brown-Forsythe and Welch Anova test with Games-Howell multiple comparison correction). \* P ≤ 0.05, \*\* P ≤ 0.01, \*\*\* P ≤ 0.001, \*\*\*\* P ≤ 0.0001.



# Appendix Figure S8

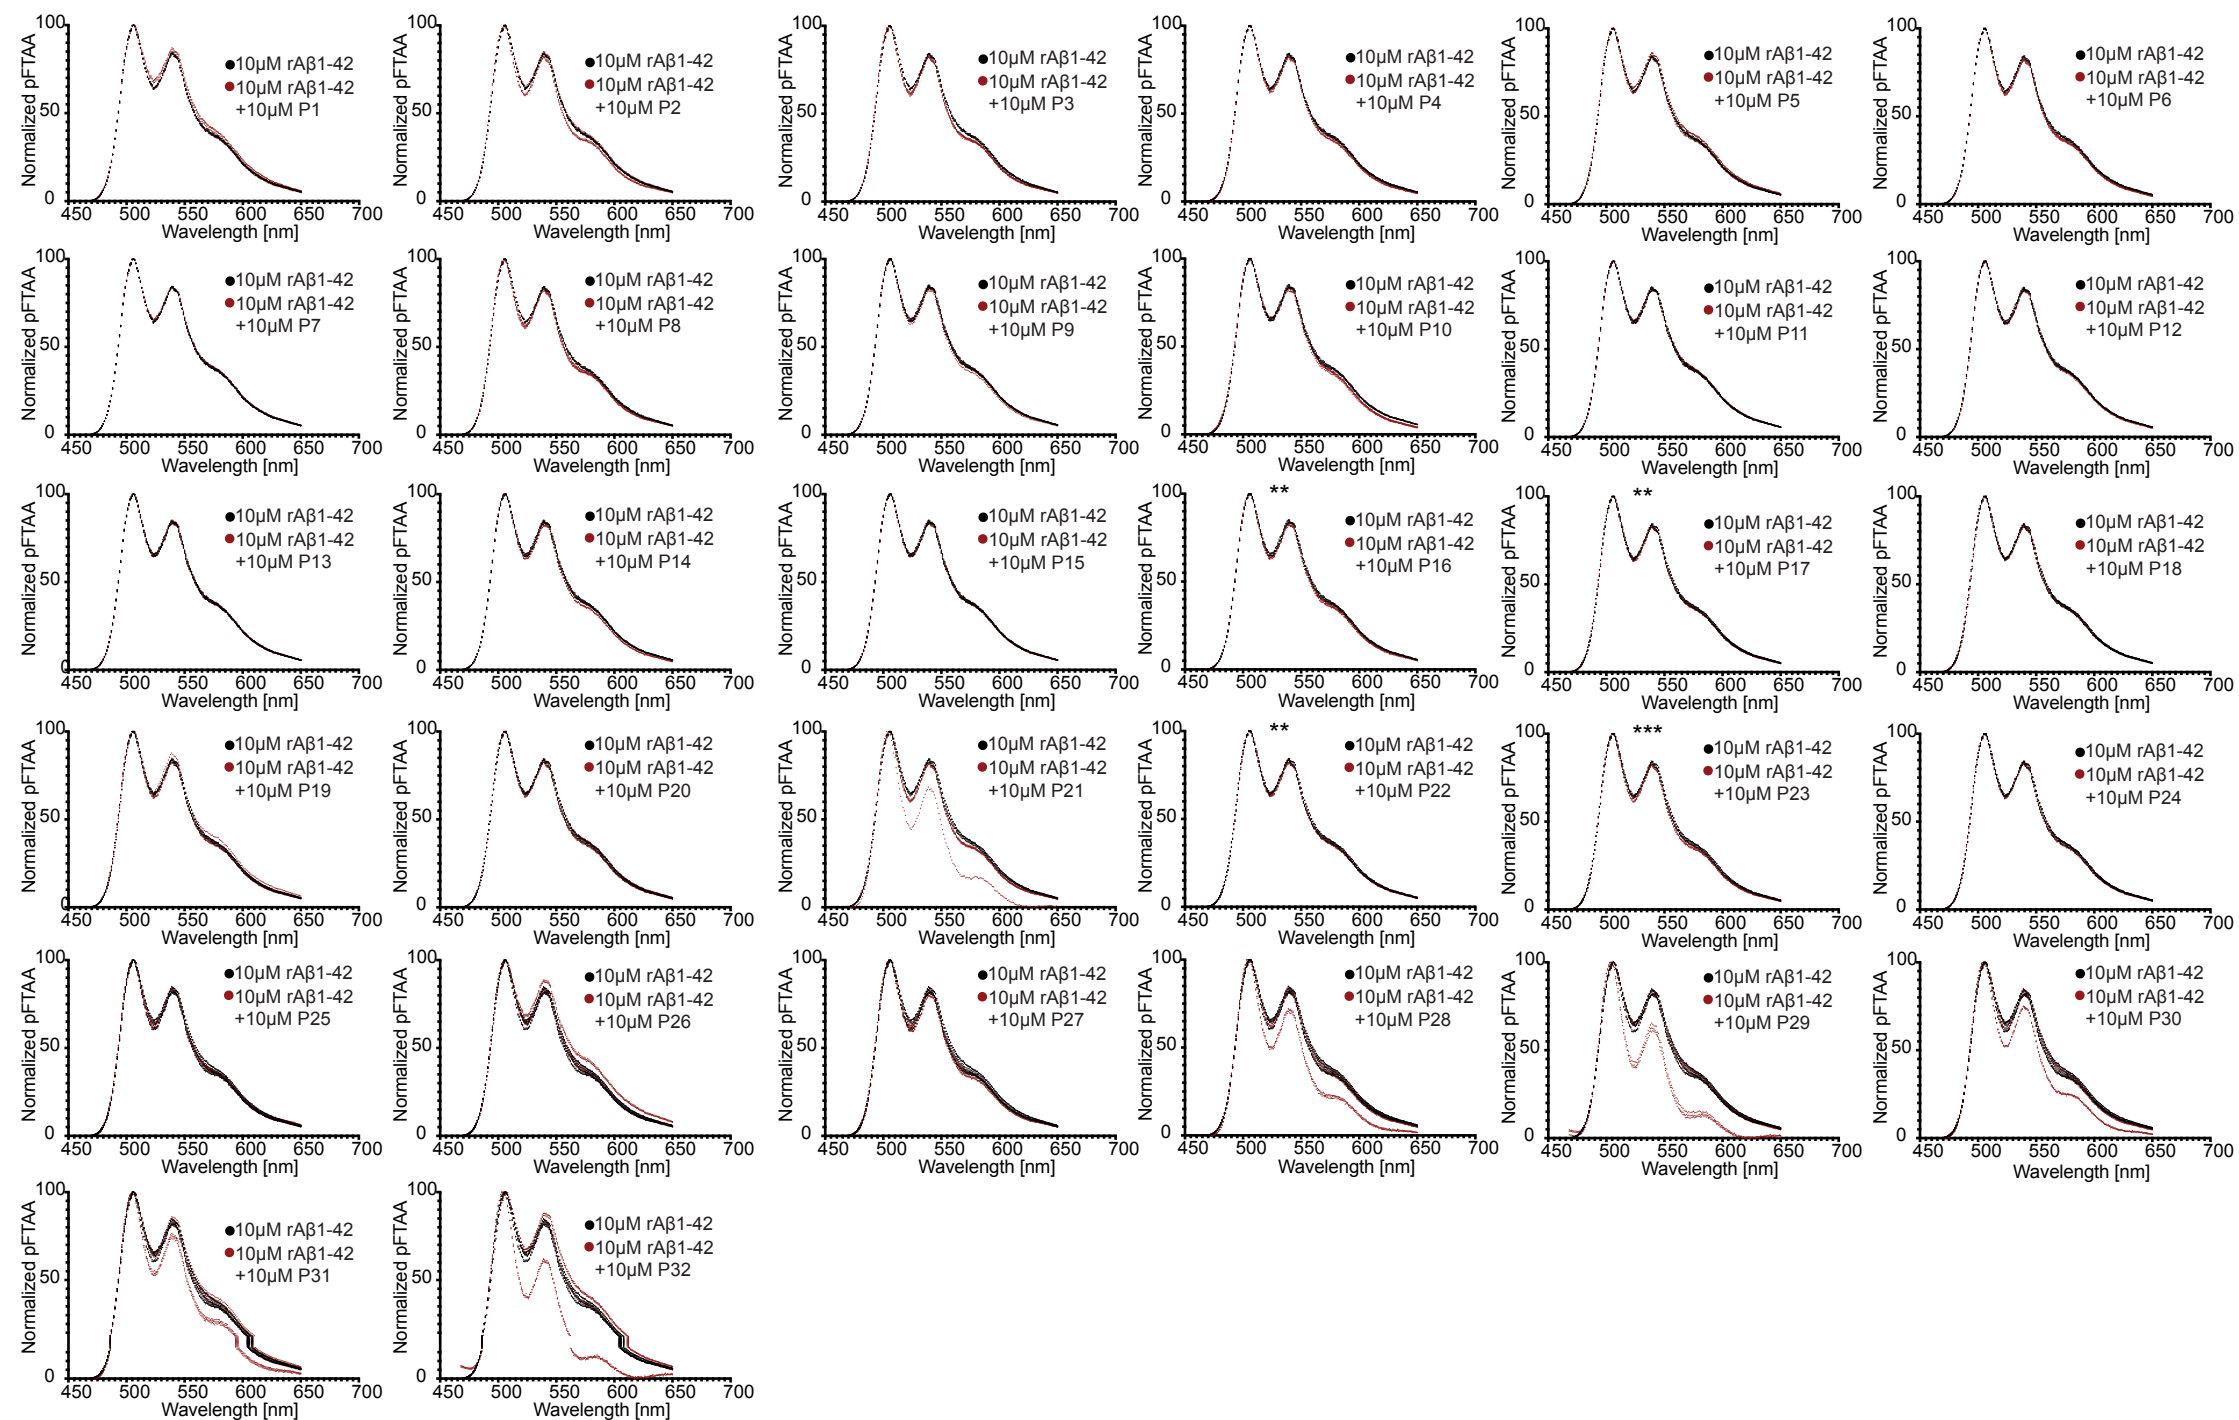

**Appendix Figure S8: Normalized pFTAA fluorescence spectrum of rAβ1-42 fibrils made in presence or absence of homologue peptides.** Black: 10μM rAβ1-42, Red: 10μM rAβ1-42+10μM peptide. n=2 independent experiments, 3 repeats, Statistics: Brown-Forsythe and Welch ANOVA test with Dunnett T3 multiple comparisons correction. \* P ≤ 0.05, \*\* P ≤ 0.01, \*\*\* P ≤ 0.001, \*\*\*\* P ≤ 0.0001

# Appendix Figure S9

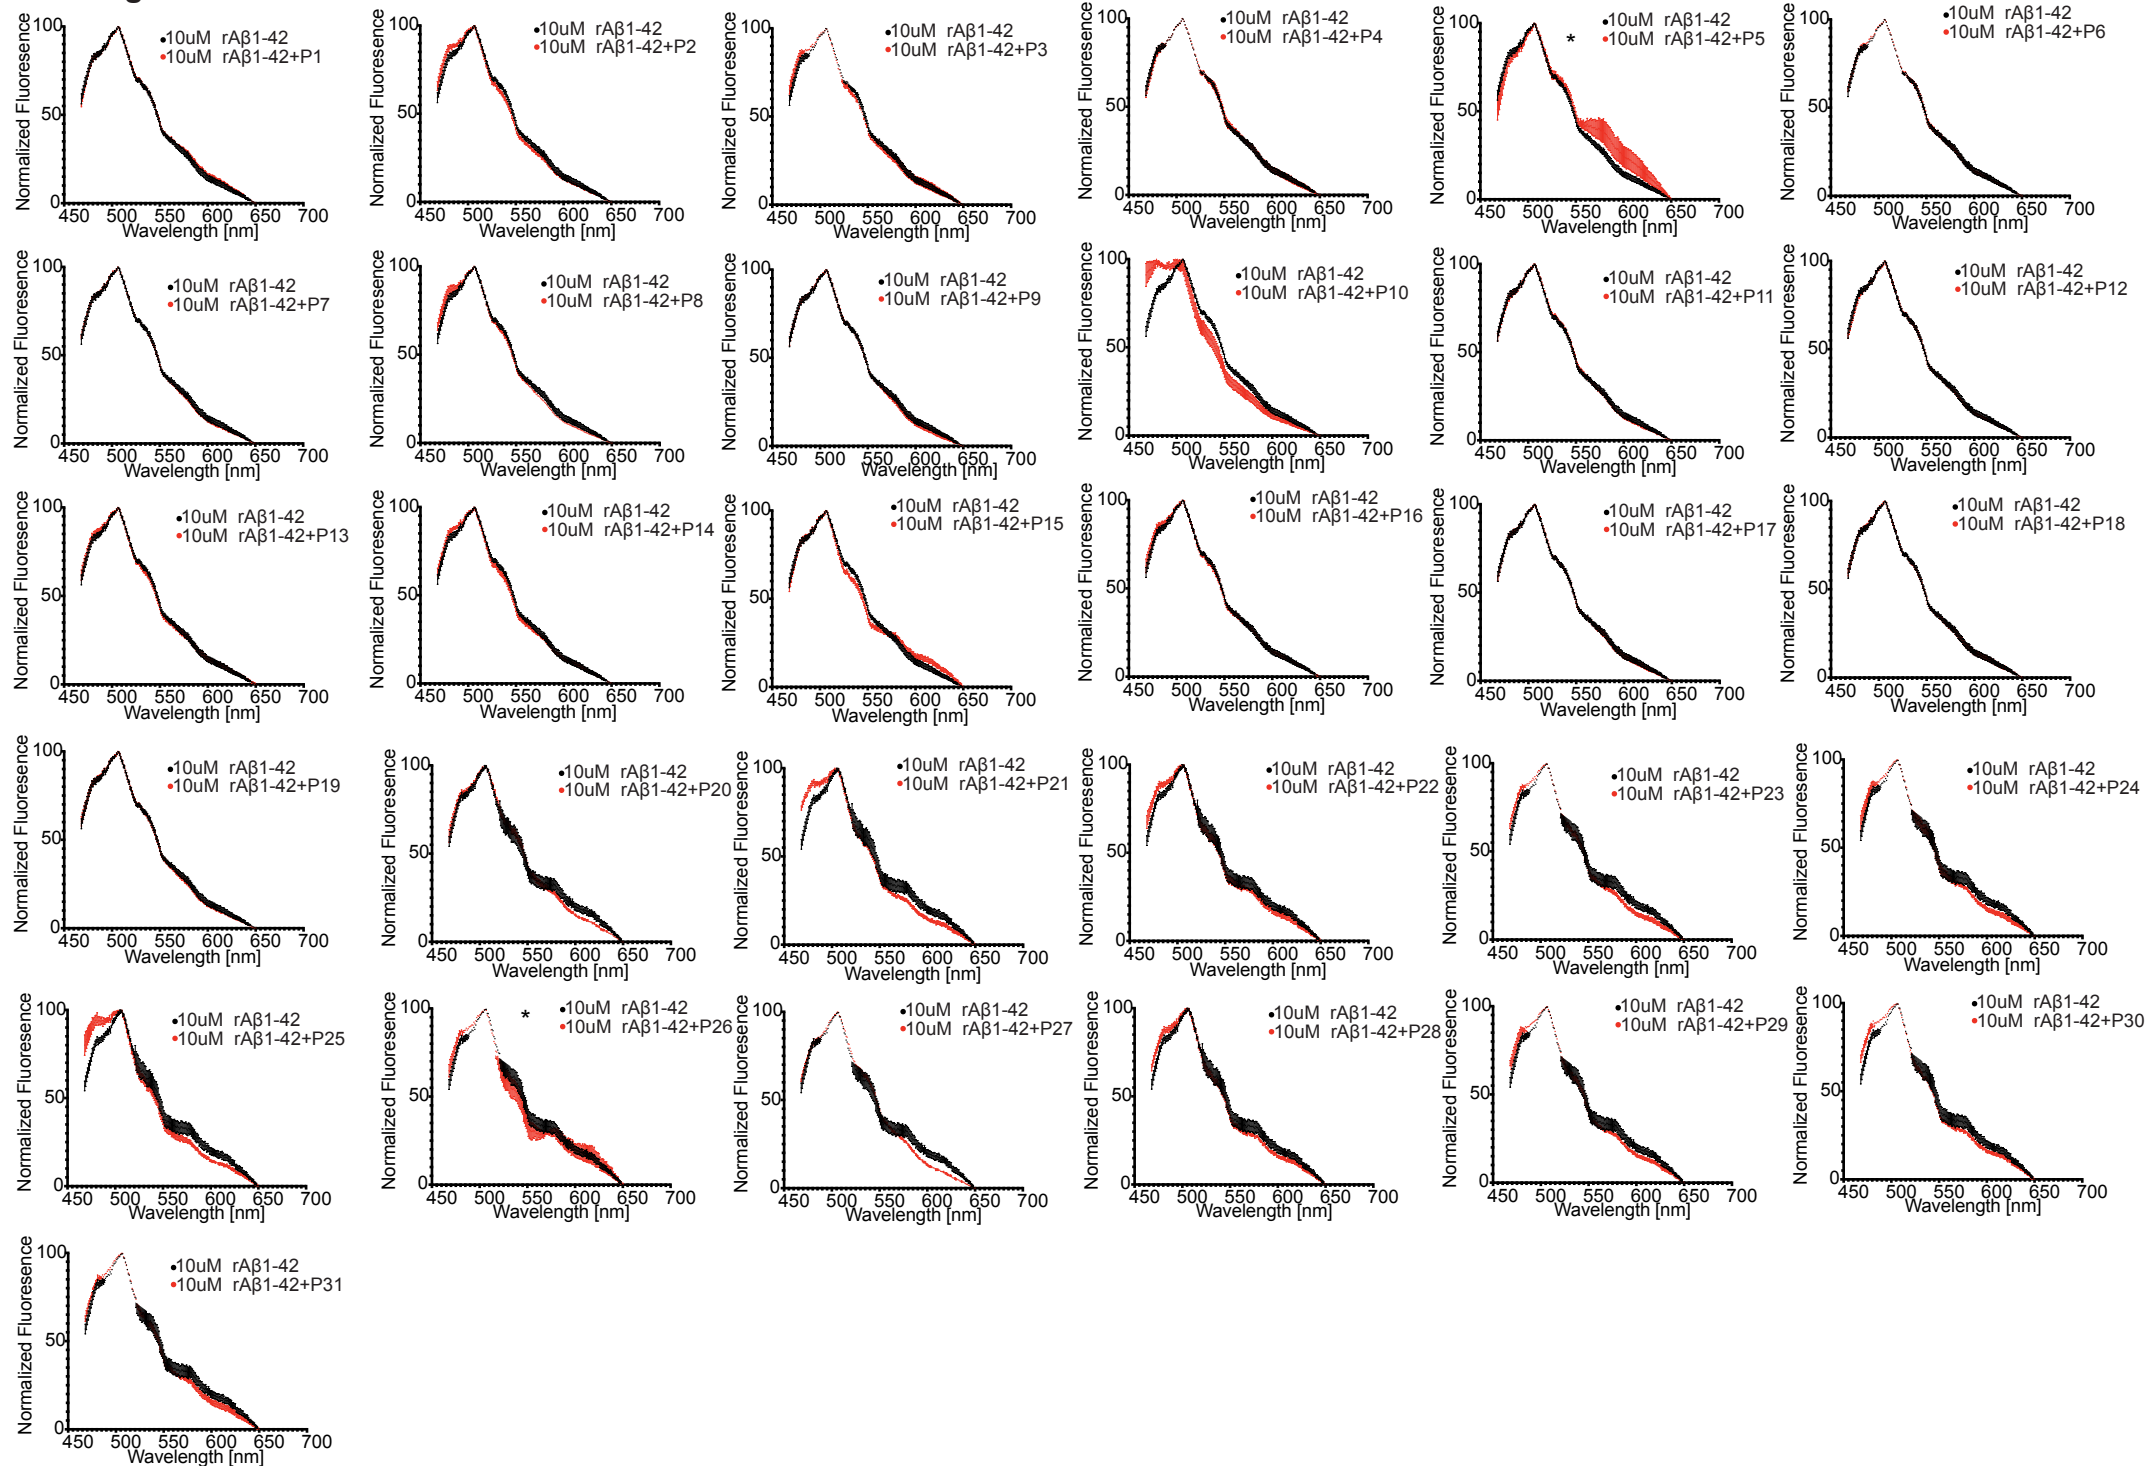

**Appendix Figure S9: Normalized Curcumin fluorescence spectrum of rAβ1-42 fibrils made in presence and absence of homologues peptides.** Black: 10μM rAβ1-42. Red: 10μM rAβ1-42+ 10μM peptide. n=2 independent experiments, at least 4 repeats. Statistics: Kolmogorov-Smirnov test. Graph: mean±SD \* P ≤0.05, \*\* P ≤0.01, \*\*\* P ≤0.001, \*\*\*\* P ≤0.0001.

**Appendix Figure S10**A $\beta$ -mcherry

6E10 antibody

Merged

**A**A $\beta$  biosensor  
seeded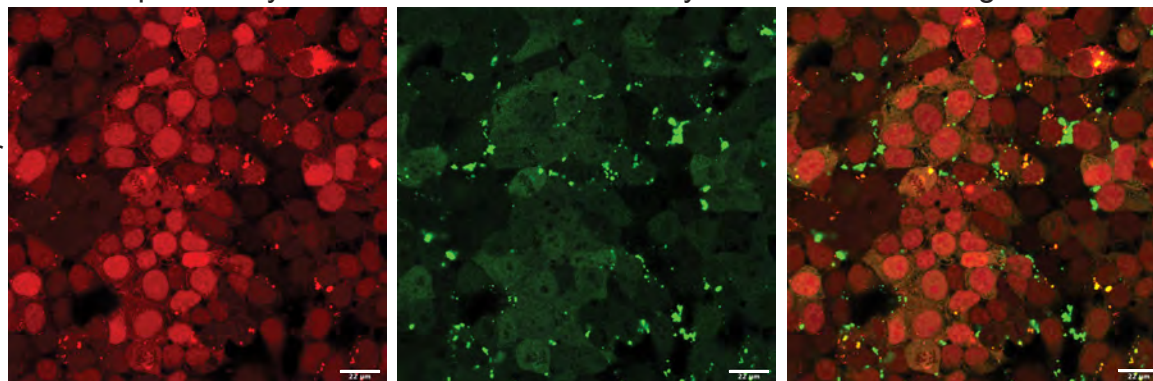**B**

Bleach (1 pulse)

Bleach (10 pulses)

Bleach (20 pulses)

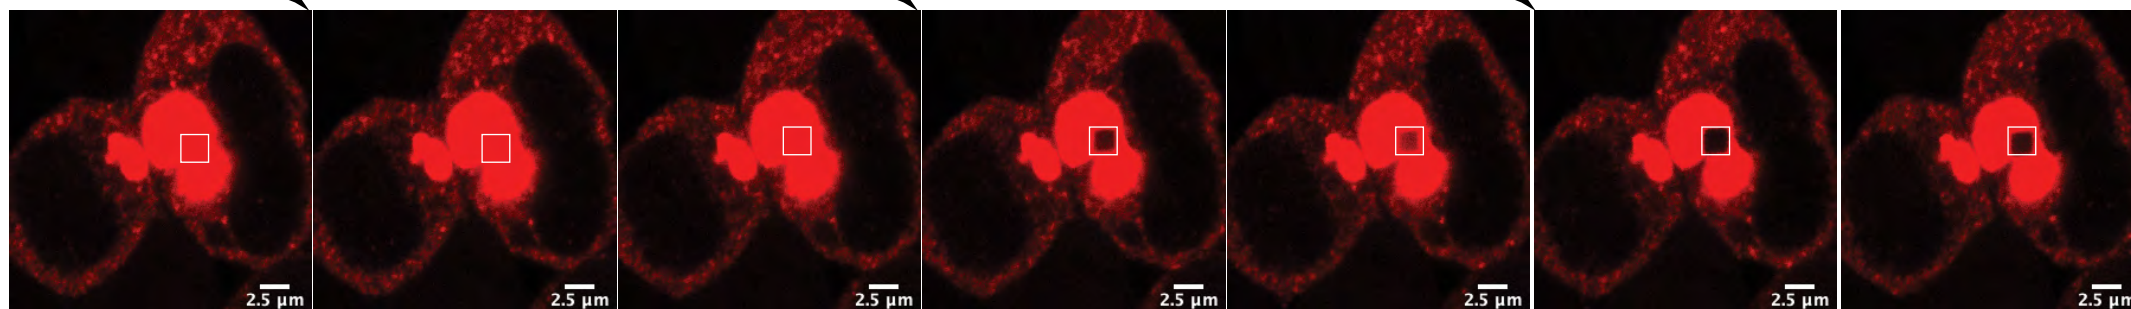**C**A $\beta$  biosensor seeded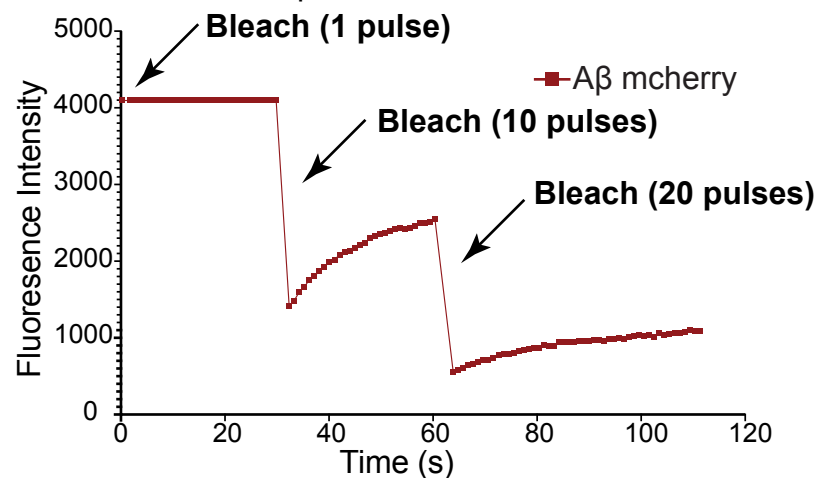**Appendix Figure S10: Inducing A $\beta$  aggregation by A $\beta$  reverse seeds.**

A. Immunostaining of A $\beta$  biosensor with 6E10 A $\beta$  antibody. A $\beta$  biosensor was transfected with rA $\beta$ 1-42 reverse seeds. Red: A $\beta$  expressed by the cell line. Green: 6E10 antibody, binds both A $\beta$  expressed and seeds. Merged: Colocalization. Scale bars: 22 $\mu$ m.

B. FRAP experiment in aggregates induced by reverse seeds. White box on images indicates the area of bleaching. Scale bar 2.5 $\mu$ m.

C. Plot of the recovery of fluorescence after photobleaching. Arrows indicate bleaching time (1,10,20 pulses)



# Appendix Figure S11

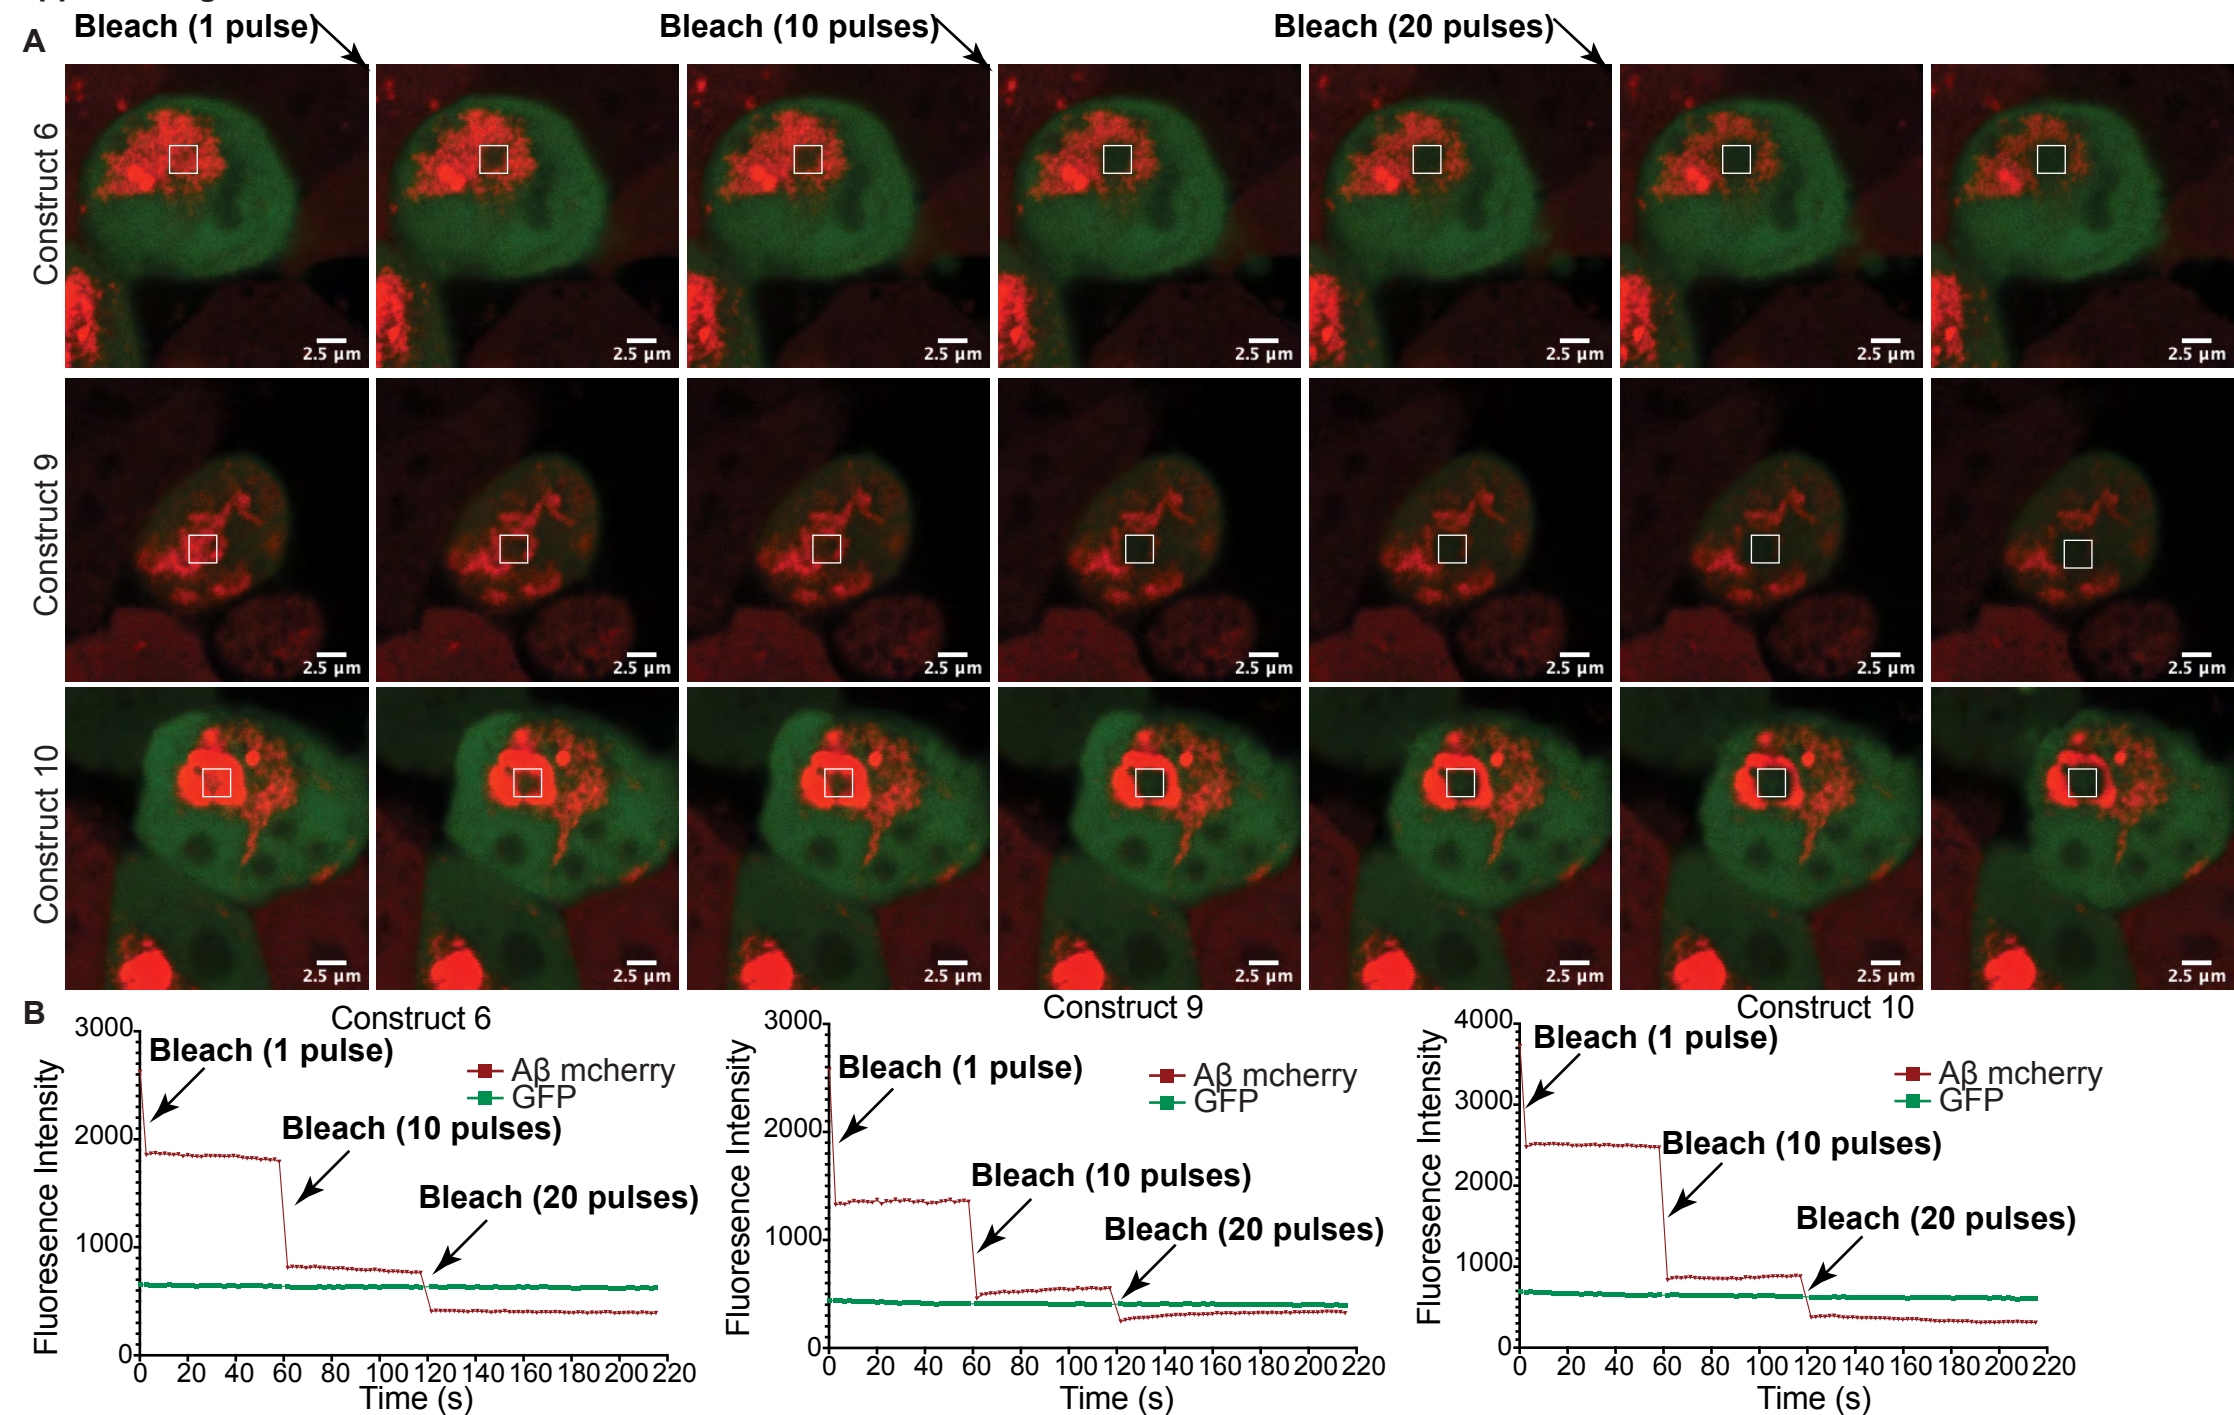

**Appendix Figure S11: FRAP of aggregates induced by constructs.**

A. FRAP analysis of Aβ aggregates in cells expressing constructs 6,9,10. Green: The reporter GFP. Red: Aβ mcherry. White box on images indicates the area of bleaching. Scale bar 2.5μm.  
 B. Fluorescence intensity measurement before and after bleaching. Arrows indicate bleaching time (1, 10,20 pulses)



## Appendix Figure S12

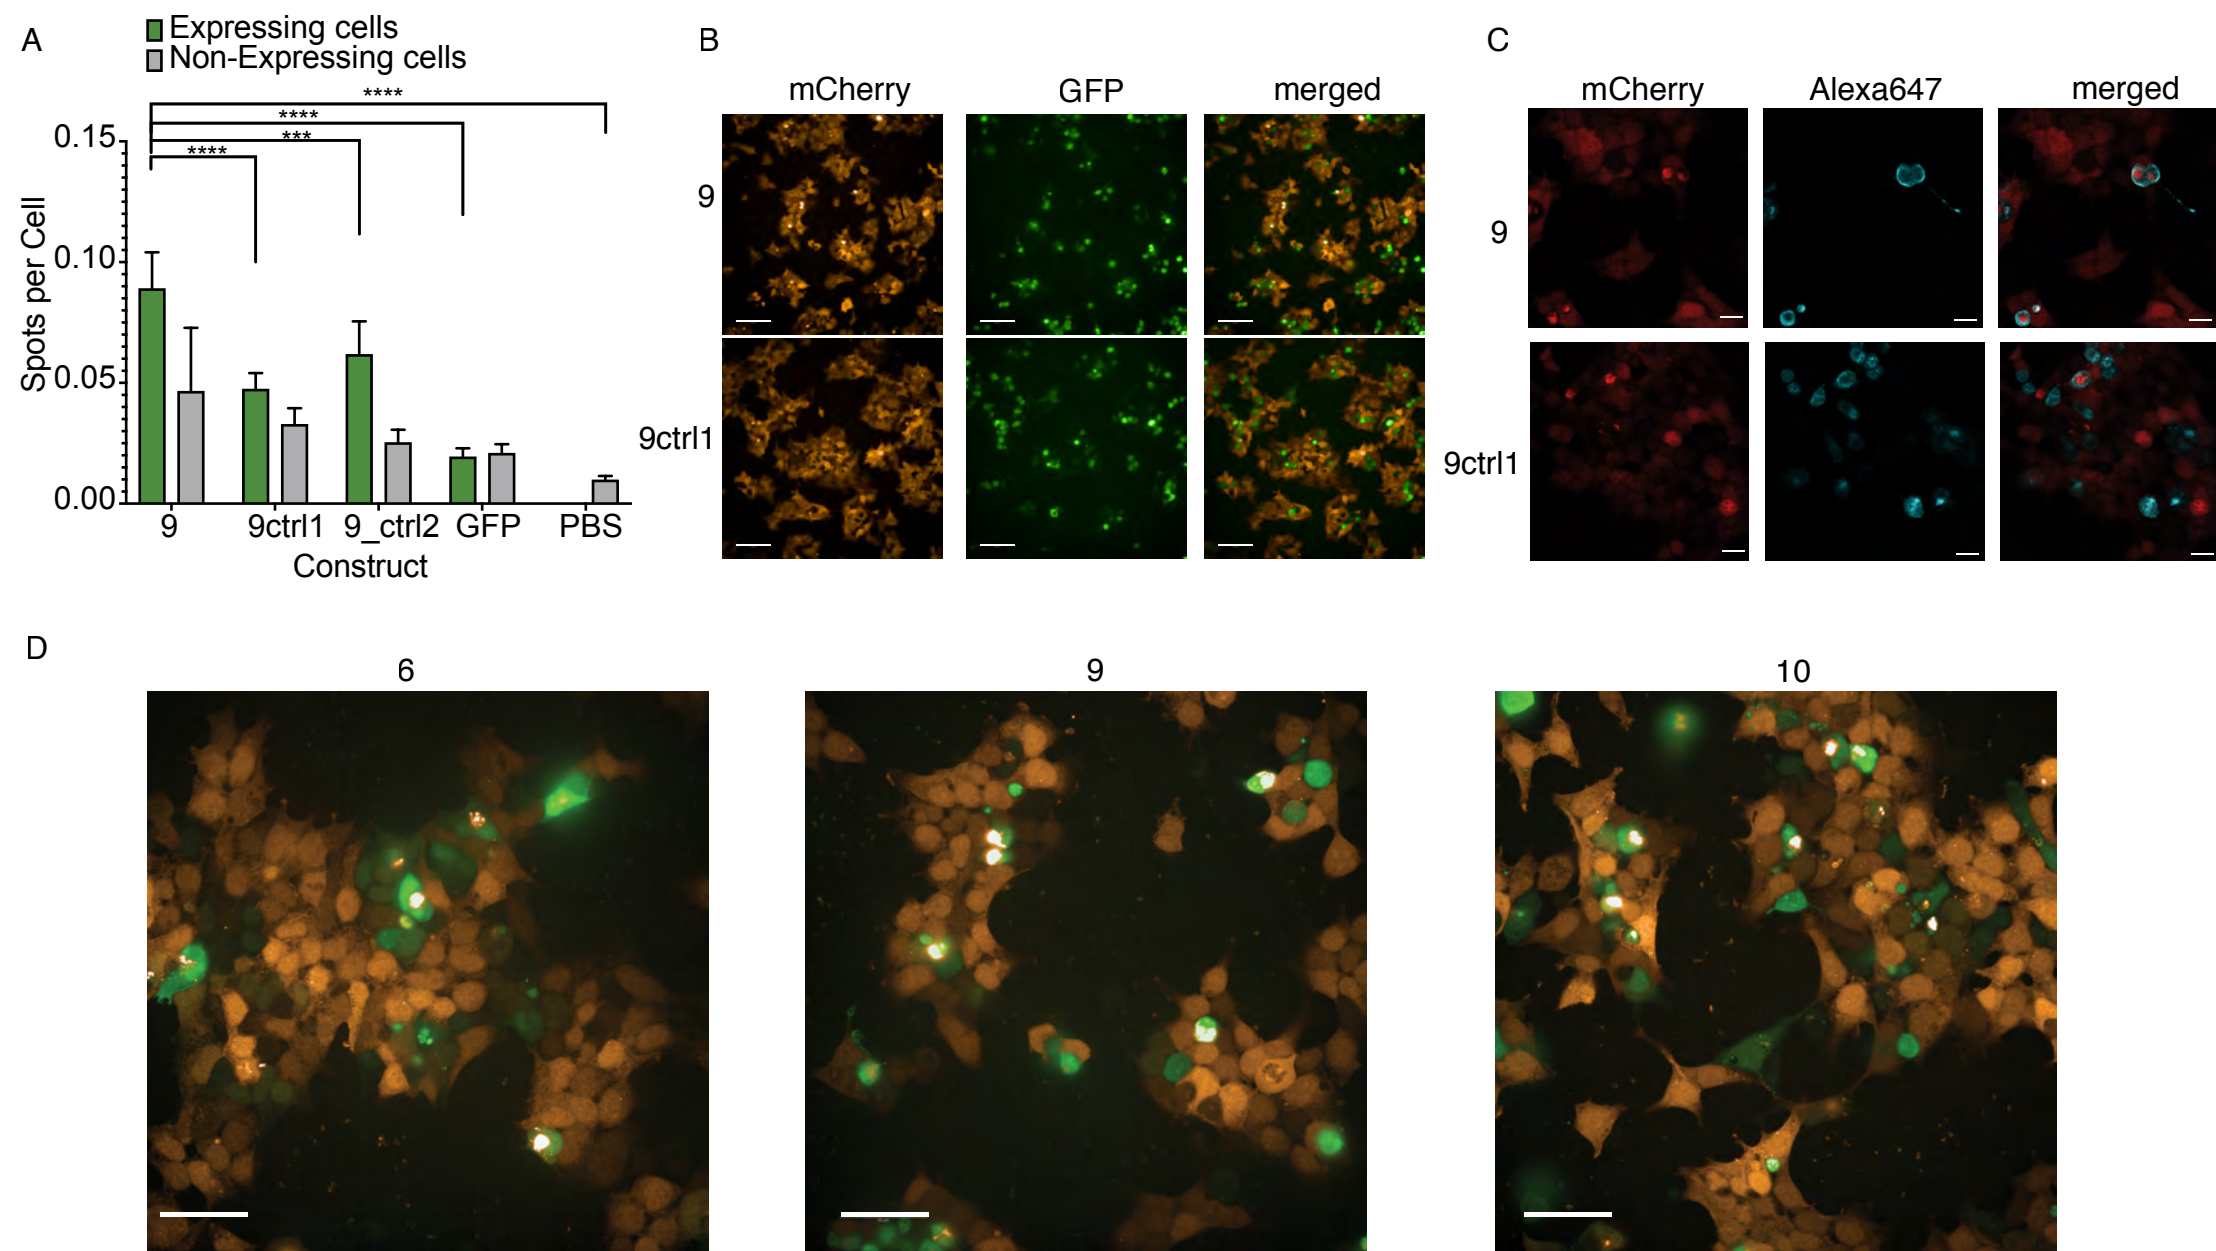

### Appendix Figure S12: Effect of expression of construct9 in aggregation of A $\beta$ .

A. Quantification of spots per cell for construct 9 and its controls. Graph: mean with 95%CI. (n=4 independent experiments, statistics: ordinary one-way Anova). \* P  $\leq$  0.05, \*\* P  $\leq$  0.01, \*\*\* P  $\leq$  0.001, \*\*\*\* P  $\leq$  0.0001

B. Representative images of 9 and 9ctrl1, mcherry indicates the A $\beta$ , GFP the transfection reporter. Scale bars: 100 $\mu$ m

C. Construct 9 and 9ctrl1 are not colocalizing with A $\beta$  aggregates, but exist in the same cells. mCherry indicates A $\beta$ , Alexa647 the constructs. Scale bar: 22 $\mu$ m

D. 40x magnification of cells expressing constructs 6,9,10, showing clear colocalization of spots in green cells. Scale bar: 50 $\mu$ m

# Appendix Figure S13

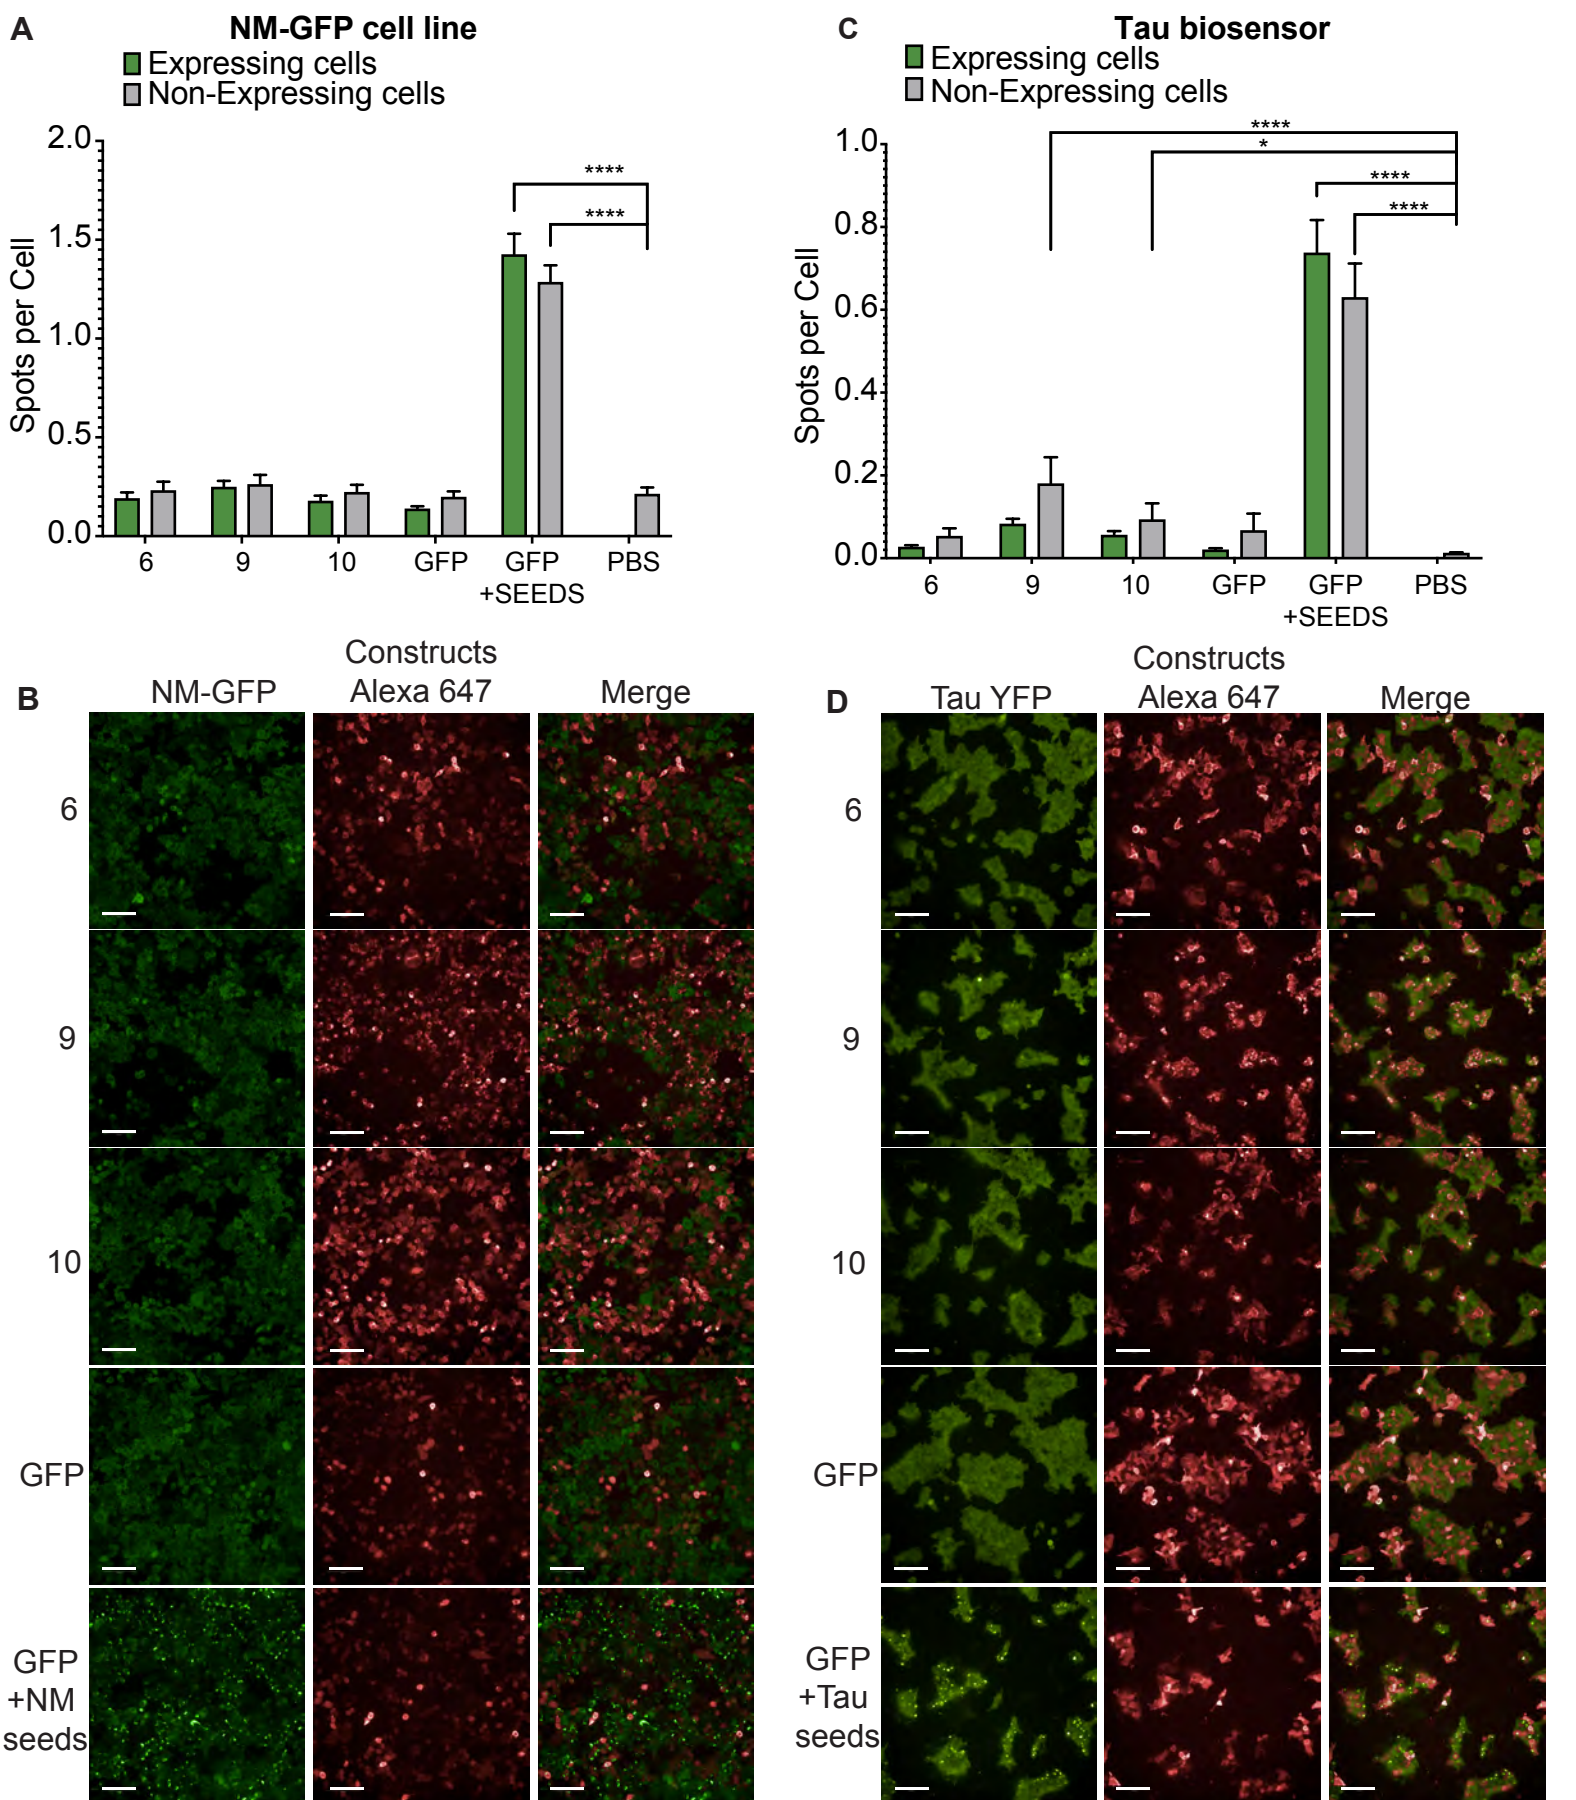

**Appendix Figure S13: Effect of expression of A $\beta$  aggregation inducing constructs in other biosensor cell lines.**

A. Quantification of spots per cell for aggregation inducer constructs (6,9,10) in NM-GFP cell line. GFP+seeds indicate the cells transfected both with GFP construct and sup35-NM seeds. Graph: mean with 95%CI. (n=6 independent experiments, statistics: ordinary one-way Anova). \* P  $\leq$  0.05, \*\* P  $\leq$  0.01, \*\*\* P  $\leq$  0.001, \*\*\*\* P  $\leq$  0.0001

B. Representative images of cells expressing the different constructs, mcherry indicates the A $\beta$ , Alexa647 the constructs. Scale bar: 100 $\mu$ m

C. Quantification of spots per cell for aggregation inducer constructs (6,9,10) in Tau biosensor cell line. GFP+seeds indicate the cells transfected both with GFP construct and Tau seeds. Graph: mean with 95%CI. (n=4 independent experiments, statistics: ordinary one-way Anova). \* P  $\leq$  0.05, \*\* P  $\leq$  0.01, \*\*\* P  $\leq$  0.001, \*\*\*\* P  $\leq$  0.0001

D. Representative images of cells expressing the different constructs, mcherry indicates the A $\beta$ , Alexa647 the constructs. Scale bars: 100 $\mu$ m
